# Supplementary material for: Transcriptomes of Injured Lamprey Axon Tips: Single-Cell RNA-Seq Suggests Differential Involvement of MAPK Signaling Pathways in Axon Retraction and Regeneration after Spinal Cord Injury
Source: MDPI journal article supplement (doi:10.3390/cells11152320), 2022-07-27
Supplement: s1 [file s1]

### map3k2-network

| gene_ID             | gene_symbol      | Average (G) | Average (S) | Average(R) |
|---------------------|------------------|-------------|-------------|------------|
| ENSPMAG00000006946  | acox3            | 6.60        | 19.78       | 0.00       |
| ENSPMAG00000004296  | FAM118A          | 3.60        | 21.67       | 26.80      |
| ENSPMAG00000006728  | fam208ab         | 6.90        | 7.00        | 0.00       |
| ENSPMAG00000006084  | hhip1l           | 6.60        | 28.22       | 0.00       |
| ENSPMAG00000004255  | map2k2a          | 17.30       | 73.44       | 0.00       |
| ENSPMAG00000005963  | map2k4a          | 681.70      | 96.56       | 340.60     |
| ENSPMAG00000004782  | map2k6           | 14.10       | 105.89      | 18.20      |
| ENSPMAG00000008753  | map2k7           | 12.30       | 4.56        | 0.00       |
| ENSPMAG00000005783  | map3k1           | 9.10        | 11.22       | 0.00       |
| ENSPMAG00000007593  | MAP3K11 (1 of 2) | 506.60      | 61.44       | 0.00       |
| ENSPMAG00000000733  | MAP3K2           | 259.10      | 0.89        | 0.00       |
| ENSPMAG00000000044  | map3k4           | 18.00       | 0.00        | 18.60      |
| ENSPMAG00000005510  | map3k7           | 5.40        | 2.11        | 3.60       |
| ENSPMAG00000008402  | mapk12b          | 12.80       | 16.56       | 32.00      |
| ENSPMAG00000001908  | MAPK14 (1 of 2)  | 226.60      | 16.56       | 0.20       |
| ENSPMAG000000008420 | MAPK14 (2 of 2)  | 6.30        | 3.89        | 18.60      |
| ENSPMAG000000000656 | MAPK8 (1 of 2)   | 9.10        | 186.11      | 2.40       |
| ENSPMAG000000003756 | MAPK8 (2 of 2)   | 4.20        | 18.56       | 232.80     |
| ENSPMAG000000000046 | nr2f1b           | 0.30        | 20.33       | 0.00       |
| ENSPMAG00000004679  | ptprga           | 44.90       | 0.22        | 0.20       |
| ENSPMAG00000005071  | smurf1           | 225.70      | 42.89       | 0.00       |
| ENSPMAG00000009839  | smyd3 (2 of 2)   | 0.00        | 0.00        | 17.20      |
| ENSPMAG00000000902  | stk38b           | 183.10      | 2.11        | 57.60      |
| ENSPMAG00000008800  | zfpm2b           | 62.80       | 3.89        | 0.00       |
| ENSPMAG00000009252  | mapk1            | 1146.90     | 316.67      | 2033.20    |

### csnk1e-network

| gene_ID             | gene_symbol      | Average (G) | Average (S) | Average(R) |
|---------------------|------------------|-------------|-------------|------------|
| ENSPMAG000000004171 | arntl1a          | 1.00        | 0.67        | 0.00       |
| ENSPMAG000000003684 | bhlhe40 (1 of 2) | 218.60      | 19.56       | 0.00       |
| ENSPMAG000000006788 | bhlhe41          | 24.90       | 12.22       | 0.00       |
| ENSPMAG000000002704 | clock3           | 156.80      | 9.78        | 287.20     |
| ENSPMAG000000004074 | cry1b            | 35.20       | 0.89        | 0.00       |
| ENSPMAG000000001522 | csnk1a1          | 163.20      | 1.11        | 0.00       |
| ENSPMAG000000007664 | csnk1e           | 214.20      | 1.11        | 0.00       |
| ENSPMAG000000006413 | dennd4a          | 5.50        | 50.56       | 5.20       |
| ENSPMAG000000007929 | esyt3            | 430.00      | 79.11       | 3.40       |
| ENSPMAG000000006961 | gstcd            | 1.00        | 4.22        | 0.00       |
| ENSPMAG000000003750 | jkamp            | 20.70       | 230.56      | 21.80      |
| ENSPMAG000000002322 | lrrc14b          | 16.70       | 0.44        | 0.00       |
| ENSPMAG000000004099 | memo1            | 663.50      | 107.78      | 178.40     |
| ENSPMAG000000008658 | mtnr1ba          | 0.00        | 0.00        | 0.40       |
| ENSPMAG000000001830 | mtss1l           | 40.00       | 63.11       | 118.80     |
| ENSPMAG000000007632 | NPAS3 (1 of 2)   | 11.30       | 10.33       | 0.00       |
| ENSPMAG000000008468 | NR1D1 (2 of 2)   | 11.60       | 0.33        | 0.00       |
| ENSPMAG000000003707 | phf20a           | 243.40      | 1.78        | 229.60     |
| ENSPMAG000000009524 | ppp1r12a         | 94.00       | 72.89       | 25.00      |
| ENSPMAG000000004996 | tcp11l2          | 226.90      | 7.11        | 0.00       |
| ENSPMAG000000008991 | timeless         | 11.30       | 18.56       | 0.20       |
| ENSPMAG000000007315 | tipin            | 125.90      | 381.56      | 0.00       |
| ENSPMAG000000001539 | tmem161          | 3.00        | 7.56        | 0.00       |
