# Supplementary material for: Transcriptomes of Injured Lamprey Axon Tips: Single-Cell RNA-Seq Suggests Differential Involvement of MAPK Signaling Pathways in Axon Retraction and Regeneration after Spinal Cord Injury
Source: MDPI journal article supplement (doi:10.3390/cells11152320), 2022-07-27
Supplement: s1 [file s1]

**Table S1A. Ten growing tips, 9 static tips and 5 retracting tips were selected for the DEG analysis.**

| <b>Animal ID</b> | <b>Status</b> | <b>Tube</b> | <b>Sample Name</b> |
|------------------|---------------|-------------|--------------------|
| 092520-8         | Growing       | 29          | G1                 |
| 100220-1         | Growing       | 35          | G2                 |
| 062620-4         | Growing       | 3           | G3                 |
| 062620-6         | Growing       | 4           | G4                 |
| 082720-10        | Growing       | 12          | G5                 |
| 090720-8         | Growing       | 14          | G6                 |
| 070320-4         | Growing       | 8           | G7                 |
| 100220-1         | Growing       | 34          | G8                 |
| 100220-2         | Growing       | 38          | G9                 |
| 091120-1         | Growing       | 15          | G10                |
| 091820-3         | Static        | 19          | S 1                |
| 092520-7         | Static        | 28          | S 2                |
| 100220-1         | Static        | 33          | S 3                |
| 062620-2         | Static        | 1           | S 4                |
| 091820-8         | Static        | 22          | S 5                |
| 092520-10        | static        | 30          | S 6                |
| 070320-7         | Static        | 9           | S 7                |
| 082720-3         | Static        | 10          | S 8                |
| 091820-7         | Static        | 21          | S 9                |
| 062620-3         | Retracting    | 2           | R1                 |
| 091820-10        | Retracting    | 24          | R2                 |
| 070320-1         | Retracting    | 7           | R3                 |
| 091820-9         | Retracting    | 23          | R4                 |
| 091120-10        | Retracting    | 18          | R5                 |

**Table S1B. Nine axon tips were excluded for the DEG analysis.** Tips were excluded from analysis either because on inspection of photomicrographs, they had grown or retracted  $> 3 \mu\text{m}$  but  $< 10 \mu\text{m}$  and thus their growth status was ambiguous, or their leading edge could not be identified with certainty, or because they had to be impaled twice in order to obtain sufficient axoplasm for analysis.

| Deleted samples |             |      |             |                                       |
|-----------------|-------------|------|-------------|---------------------------------------|
| Animal ID       | Status      | Tube | Sample Name | Notes                                 |
| 092520-1        | Growing?    | 25   | G11         | status ambiguous                      |
| 090720-1        | Growing     | 13   | G12         | impaled twice, possible contamination |
| 092520-4        | Growing?    | 27   | G13         | status ambiguous                      |
| 092520-2        | Growing?    | 26   | G14         | status ambiguous                      |
| 091820-6        | Growing     | 20   | G15         | impaled twice, possible contamination |
| 082720-4        | Growing?    | 11   | G16         | impaled twice, possible contamination |
| 100220-1        | Static?     | 37   | S10         | front edge not well defined           |
| 091120-4        | Static      | 16   | S11         | impaled twice, possible contamination |
| 091120-8        | Retracting? | 17   | R6          | status ambiguous                      |
