# Supplementary material for: Transcriptomes of Injured Lamprey Axon Tips: Single-Cell RNA-Seq Suggests Differential Involvement of MAPK Signaling Pathways in Axon Retraction and Regeneration after Spinal Cord Injury
Source: MDPI journal article supplement (doi:10.3390/cells11152320), 2022-07-27
Supplement: s1 [file s1]

A

|       | R^2     |
|-------|---------|
| G1,2  | 0.107   |
| G1,3  | 0.06991 |
| G1,4  | 0.05388 |
| G1,5  | 0.1314  |
| G1,6  | 0.1571  |
| G1,7  | 0.1283  |
| G1,8  | 0.07303 |
| G1,9  | 0.103   |
| G1,10 | 0.1271  |
| G2,3  | 0.05715 |
| G2,4  | 0.05608 |
| G2,5  | 0.1014  |
| G2,6  | 0.1278  |
| G2,7  | 0.1096  |
| G2,8  | 0.06505 |
| G2,9  | 0.1054  |
| G2,10 | 0.0961  |
| G3,4  | 0.06769 |
| G3,5  | 0.05311 |
| G3,6  | 0.1025  |
| G3,7  | 0.06747 |
| G3,8  | 0.1167  |
| G3,9  | 0.01841 |
| G3,10 | 0.0723  |
| G4,5  | 0.04496 |
| G4,6  | 0.06615 |
| G4,7  | 0.05101 |
| G4,8  | 0.07806 |
| G4,9  | 0.02391 |
| G4,10 | 0.05287 |
| G5,6  | 0.3652  |
| G5,7  | 0.2447  |
| G5,8  | 0.047   |
| G5,9  | 0.1947  |
| G5,10 | 0.2359  |
| G6,7  | 0.3291  |
| G6,8  | 0.07468 |
| G6,9  | 0.2068  |
| G6,10 | 0.3497  |
| G7,8  | 0.06409 |
| G7,9  | 0.1785  |
| G7,10 | 0.2109  |
| G8,9  | 0.01463 |
| G8,10 | 0.06232 |
| G9,10 | 0.1401  |
| S1,2  | 0.01909 |
| S1,3  | 0.1477  |
| S1,4  | 0.04939 |
| S1,5  | 0.1695  |
| S1,6  | 0.1504  |
| S1,7  | 0.1805  |
| S1,8  | 0.1626  |
| S1,9  | 0.1518  |
| S2,3  | 0.01145 |
| S2,4  | 0.07875 |
| S2,5  | 0.01149 |
| S2,6  | 0.02989 |
| S2,7  | 0.01603 |
| S2,8  | 0.01791 |
| S2,9  | 0.02477 |
| S3,4  | 0.04105 |
| S3,5  | 0.2064  |
| S3,6  | 0.1627  |
| S3,7  | 0.2165  |
| S3,8  | 0.2033  |
| S3,9  | 0.163   |
| S4,5  | 0.04712 |
| S4,6  | 0.08563 |
| S4,7  | 0.05958 |
| S4,8  | 0.0637  |
| S4,9  | 0.05937 |
| S5,6  | 0.3155  |
| S5,7  | 0.4376  |
| S5,8  | 0.3871  |
| S5,9  | 0.2792  |
| S6,7  | 0.3282  |
| S6,8  | 0.2965  |
| S6,9  | 0.2213  |
| S7,8  | 0.4285  |
| S7,9  | 0.2522  |
| S8,9  | 0.2383  |
| R1,2  | 0.0368  |
| R1,3  | 0.02979 |
| R1,4  | 0.02511 |
| R1,5  | 0.04384 |
| R2,3  | 0.1872  |
| R2,4  | 0.03849 |
| R2,5  | 0.166   |
| R3,4  | 0.0196  |
| R3,5  | 0.1009  |
| R4,5  | 0.04869 |

B

|     | G1      | G2      | G3      | G4      | G5      | G6      | G7      | G8      | G9      | G10     | sum-R^2 |       |
|-----|---------|---------|---------|---------|---------|---------|---------|---------|---------|---------|---------|-------|
| G1  |         | 1       | 0.107   | 0.06991 | 0.05388 | 0.1314  | 0.1571  | 0.1283  | 0.07303 | 0.103   | 0.1271  | 0.951 |
| G2  | 0.107   |         | 1       | 0.05715 | 0.05608 | 0.1014  | 0.1278  | 0.1096  | 0.06505 | 0.1054  | 0.0961  | 0.826 |
| G3  | 0.06991 | 0.05715 |         | 1       | 0.06769 | 0.05311 | 0.1025  | 0.06747 | 0.1167  | 0.01841 | 0.0723  | 0.625 |
| G4  | 0.05388 | 0.05608 | 0.06769 |         | 1       | 0.04496 | 0.06615 | 0.05101 | 0.07806 | 0.02391 | 0.05287 | 0.495 |
| G5  | 0.1314  | 0.1014  | 0.05311 | 0.04496 |         | 1       | 0.3652  | 0.2447  | 0.047   | 0.1947  | 0.2359  | 1.418 |
| G6  | 0.1571  | 0.1278  | 0.1025  | 0.06615 | 0.3652  |         | 1       | 0.3291  | 0.07468 | 0.2068  | 0.3497  | 1.779 |
| G7  | 0.1283  | 0.1096  | 0.06747 | 0.05101 | 0.2447  | 0.3291  |         | 1       | 0.06409 | 0.1785  | 0.2109  | 1.384 |
| G8  | 0.07303 | 0.06505 | 0.1167  | 0.07806 | 0.047   | 0.07468 | 0.06409 |         | 1       | 0.01463 | 0.06232 | 0.596 |
| G9  | 0.103   | 0.1054  | 0.01841 | 0.02391 | 0.1947  | 0.2068  | 0.1785  | 0.01463 |         | 1       | 0.1401  | 0.985 |
| G10 | 0.1271  | 0.0961  | 0.0723  | 0.05287 | 0.2359  | 0.3497  | 0.2109  | 0.06232 | 0.1401  |         | 1       | 1.347 |

|    | S1      | S2      | S3      | S4      | S5      | S6      | S7      | S8      | S9      |       |
|----|---------|---------|---------|---------|---------|---------|---------|---------|---------|-------|
| S1 | 1       | 0.01909 | 0.1477  | 0.04939 | 0.1695  | 0.1504  | 0.1805  | 0.1626  | 0.1518  | 1.031 |
| S2 | 0.01909 | 1       | 0.01145 | 0.07875 | 0.01149 | 0.02989 | 0.01603 | 0.01791 | 0.02477 | 0.209 |
| S3 | 0.1477  | 0.01145 | 1       | 0.04105 | 0.2064  | 0.1627  | 0.2165  | 0.2033  | 0.163   | 1.152 |
| S4 | 0.04939 | 0.07875 | 0.04105 | 1       | 0.04712 | 0.08563 | 0.05958 | 0.0637  | 0.05937 | 0.485 |
| S5 | 0.1695  | 0.01149 | 0.2064  | 0.04712 | 1       | 0.3155  | 0.4376  | 0.3871  | 0.2792  | 1.854 |
| S6 | 0.1504  | 0.02989 | 0.1627  | 0.08563 | 0.3155  | 1       | 0.3282  | 0.2965  | 0.2213  | 1.590 |
| S7 | 0.1805  | 0.01603 | 0.2165  | 0.05958 | 0.4376  | 0.3282  | 1       | 0.4285  | 0.2522  | 1.919 |
| S8 | 0.1626  | 0.01791 | 0.2033  | 0.0637  | 0.3871  | 0.2965  | 0.4285  | 1       | 0.2383  | 1.798 |
| S9 | 0.1518  | 0.02477 | 0.163   | 0.05937 | 0.2792  | 0.2213  | 0.2522  | 0.2383  | 1       | 1.390 |

|    | R1      | R2      | R3      | R4      | R5      |       |
|----|---------|---------|---------|---------|---------|-------|
| R1 | 1       | 0.0368  | 0.02979 | 0.02511 | 0.04384 | 0.136 |
| R2 | 0.0368  | 1       | 0.1872  | 0.03849 | 0.166   | 0.428 |
| R3 | 0.02979 | 0.1872  | 1       | 0.0196  | 0.1009  | 0.337 |
| R4 | 0.02511 | 0.03849 | 0.0196  | 1       | 0.04869 | 0.132 |
| R5 | 0.04384 | 0.166   | 0.1009  | 0.04869 | 1       | 0.359 |
