# Supplementary material for: Transcriptomes of Injured Lamprey Axon Tips: Single-Cell RNA-Seq Suggests Differential Involvement of MAPK Signaling Pathways in Axon Retraction and Regeneration after Spinal Cord Injury
Source: MDPI journal article supplement (doi:10.3390/cells11152320), 2022-07-27
Supplement: s1 [file s1]

| Table-A (G > S&R) |                                                                               |                                  |                                                        |                                                                                                                                |
|-------------------|-------------------------------------------------------------------------------|----------------------------------|--------------------------------------------------------|--------------------------------------------------------------------------------------------------------------------------------|
| Entrez Gene-ID    | Gene Name                                                                     | BBID                             | BIOCARTA                                               | KEGG_PATHWAY                                                                                                                   |
| 607               | BCL9 transcription coactivator(BCL9)                                          |                                  |                                                        |                                                                                                                                |
| 55571             | CCR4-NOT transcription complex subunit 11(CNOT11)                             |                                  |                                                        |                                                                                                                                |
| 51496             | CTD small phosphatase like 2(CTDSPL2)                                         |                                  |                                                        |                                                                                                                                |
| 3980              | DNA ligase 3(LIG3)                                                            |                                  |                                                        | hsa03410:Base excision repair,                                                                                                 |
| 57697             | FA complementation group M(FANCM)                                             |                                  |                                                        | hsa03460:Fanconi anemia pathway,                                                                                               |
| 60681             | FKBP prolyl isomerase 10(FKBP10)                                              |                                  |                                                        |                                                                                                                                |
| 60558             | GTP binding elongation factor GUF1(GUF1)                                      |                                  |                                                        |                                                                                                                                |
| 55127             | HEAT repeat containing 1(HEATR1)                                              |                                  |                                                        | hsa03008:Ribosome biogenesis in eukaryotes,                                                                                    |
| 284058            | KAT8 regulatory NSL complex subunit 1(KANSL1)                                 |                                  |                                                        |                                                                                                                                |
| 374354            | NHL repeat containing 2(NHLRC2)                                               |                                  |                                                        |                                                                                                                                |
| 23386             | NudC domain containing 3(NUDCD3)                                              |                                  |                                                        |                                                                                                                                |
| 5395              | PMS1 homolog 2, mismatch repair system component(PMS2)                        |                                  |                                                        | hsa03430:Mismatch repair,hsa03460:Fanconi anemia pathway,                                                                      |
| 29101             | SSU72 homolog, RNA polymerase II CTD phospatase(SSU72)                        |                                  |                                                        | hsa03015:mRNA surveillance pathway,                                                                                            |
| 9013              | TATA-box binding protein associated factor, RNA polymerase I subunit C(TAF1C) |                                  |                                                        |                                                                                                                                |
| 64743             | WD repeat domain 13(WDR13)                                                    |                                  |                                                        |                                                                                                                                |
| 84219             | WD repeat domain 24(WDR24)                                                    |                                  |                                                        | hsa04150:mTOR signaling pathway,                                                                                               |
| 54432             | Yip1 domain family member 1(YIPF1)                                            |                                  |                                                        |                                                                                                                                |
| 9520              | aminopeptidase puromycin sensitive(NPEPP5)                                    |                                  |                                                        |                                                                                                                                |
| 1454              | casein kinase 1 epsilon(CSNK1E)                                               |                                  | h_circadianPathway:Circadian Rhythms,                  | hsa04710:Circadian rhythm, hsa04068:FoxO signaling pathway,hsa04310:Wnt signaling pathway,hsa04340:Hedgehog signaling, etc.    |
| 80125             | coiled-coil domain containing 33(CCDC33)                                      |                                  |                                                        |                                                                                                                                |
| 1036              | cysteine dioxygenase type 1(CDO1)                                             |                                  |                                                        | hsa00270:Cysteine and methionine metabolism,hsa00430:Taurine and hypotaurine metabolism,hsa01100:Metabolic pathways, etc.      |
| 23332             | cytoplasmic linker associated protein 1(CLASP1)                               |                                  |                                                        |                                                                                                                                |
| 1801              | diphthamide biosynthesis 1(DPH1)                                              |                                  |                                                        |                                                                                                                                |
| 55862             | ethylmalonyl-CoA decarboxylase 1(ECHDC1)                                      |                                  |                                                        | hsa00640:Propanoate metabolism,hsa01100:Metabolic pathways,                                                                    |
| 84668             | family with sequence similarity 126 member A(FAM126A)                         |                                  |                                                        |                                                                                                                                |
| 2968              | general transcription factor IIH subunit 4(UTF2H4)                            |                                  |                                                        | hsa03022:Basal transcription factors,hsa03420:Nucleotide excision repair,hsa05203:Viral carcinogenesis,                        |
| 55726             | integrator complex subunit 13(INTS13)                                         |                                  |                                                        |                                                                                                                                |
| 64135             | interferon induced with helicase C domain 1(IFIH1)                            |                                  |                                                        | hsa04622:RIG-I-like receptor signaling pathway, hsa05161:Hepatitis B, hsa05162:Measles,hsa05164:Influenza A, etc.              |
| 144501            | keratin 80(KRT80)                                                             |                                  |                                                        |                                                                                                                                |
| 10746             | mitogen-activated protein kinase kinase kinase 2(MAP3K2)                      | 100.MAPK_signaling_cascades,     | h_mapkPathway:MAPKinase Signaling Pathway,             | hsa04010:MAPK signaling pathway,hsa04540:Gap junction,hsa04912:GnRH signaling pathway,                                         |
| 7468              | nuclear receptor binding SET domain protein 2(NSD2)                           |                                  |                                                        | hsa00310:Lysine degradation,hsa01100:Metabolic pathways,hsa05202:Transcriptional misregulation in cancer,                      |
| 25926             | nucleolar protein 11(NOL11)                                                   |                                  |                                                        |                                                                                                                                |
| 9487              | phosphatidylinositol glycan anchor biosynthesis class L(PIGL)                 |                                  |                                                        | hsa00563:Glycosylphosphatidylinositol (GPI)-anchor biosynthesis,hsa01100:Metabolic pathways,                                   |
| 130535            | potassium channel tetramerization domain containing 18(KCTD18)                |                                  |                                                        |                                                                                                                                |
| 80162             | protein-glucosylgalactosylhydroxyllysine glucosidase(PGGHG)                   |                                  |                                                        |                                                                                                                                |
| 6608              | smoothened, frizzled class receptor(SMO)                                      |                                  | h_shhPathway:Sonic Hedgehog (Shh) Pathway,             | hsa04340:Hedgehog signaling pathway, hsa04360:Axon guidance, hsa05200:Pathways in cancer,                                      |
| 85451             | unk zinc finger(UNK)                                                          |                                  |                                                        |                                                                                                                                |
| 7707              | zinc finger protein 148(ZNF148)                                               |                                  |                                                        |                                                                                                                                |
|                   |                                                                               |                                  |                                                        |                                                                                                                                |
| Table-B (S > G&R) |                                                                               |                                  |                                                        |                                                                                                                                |
| Entrez Gene-ID    | Gene Name                                                                     | BBID                             | BIOCARTA                                               | KEGG_PATHWAY                                                                                                                   |
| 491               | ATPase plasma membrane Ca2+ transporting 2(ATP2B2)                            |                                  |                                                        | hsa04020:Calcium signaling pathway, hsa04022:cGMP-PKG signaling pathway, hsa04024:cAMP signaling pathway, etc.                 |
| 27163             | N-acyl ethanolamine acid amidase(NAAA)                                        |                                  |                                                        |                                                                                                                                |
| 54726             | OTU deubiquitinase 4(OTUD4)                                                   |                                  |                                                        |                                                                                                                                |
| 64902             | alanine-glyoxylate aminotransferase 2(AGXT2)                                  |                                  |                                                        | hsa00250:Alanine, aspartate and glutamate metabolism, hsa01100:Metabolic pathways, etc.                                        |
| 8839              | cellular communication network factor 5(CCN5)                                 |                                  |                                                        |                                                                                                                                |
| 1277              | collagen type I alpha 1 chain(COL1A1)                                         |                                  |                                                        | hsa04151:PI3K-Akt signaling pathway, hsa04510:Focal adhesion, hsa04512:ECM-receptor interaction, etc.                          |
| 11068             | cytochrome b561 family member D2(CYB561D2)                                    |                                  |                                                        |                                                                                                                                |
| 89978             | diphthamine biosynthesis 6(DPH6)                                              |                                  |                                                        |                                                                                                                                |
| 9669              | eukaryotic translation initiation factor 5B(EIF5B)                            |                                  |                                                        |                                                                                                                                |
| 10634             | growth arrest specific 2 like 1(GAS2L1)                                       |                                  |                                                        |                                                                                                                                |
| 5599              | mitogen-activated protein kinase 8(MAPK8)                                     | 100.MAPK_signaling_cascades,101. | h_dspPathway:Regulation of MAP Kinase Pathways Through | hsa04010:MAPK signaling pathway, hsa04012:ErbB signaling pathway, hsa04014:Ras signaling pathway, etc.                         |
| 91775             | neurexophilin and PC-esterase domain family member 3(NXPE3)                   |                                  |                                                        |                                                                                                                                |
| 27156             | radial spoke head 14 homolog(RSPH14)                                          |                                  |                                                        |                                                                                                                                |
| 54778             | ring finger protein 111(RNF111)                                               |                                  |                                                        |                                                                                                                                |
| 192683            | secretory carrier membrane protein 5(SCAMP5)                                  |                                  |                                                        |                                                                                                                                |
| 8991              | selenium binding protein 1(SELENBP1)                                          |                                  |                                                        | hsa00920:Sulfur metabolism,hsa01100:Metabolic pathways,                                                                        |
| 57419             | solute carrier family 24 member 3(SLC24A3)                                    |                                  |                                                        |                                                                                                                                |
| 51000             | solute carrier family 35 member B3(SLC35B3)                                   |                                  |                                                        |                                                                                                                                |
| 6975              | tectorin beta(TECTB)                                                          |                                  |                                                        |                                                                                                                                |
| 54957             | thioredoxin like 4B(TXNL4B)                                                   |                                  |                                                        |                                                                                                                                |
|                   |                                                                               |                                  |                                                        |                                                                                                                                |
| Table-C (R > G&S) |                                                                               |                                  |                                                        |                                                                                                                                |
| Entrez Gene-ID    | Gene Name                                                                     | BBID                             | BIOCARTA                                               | KEGG_PATHWAY                                                                                                                   |
| 80067             | DDB1 and CUL4 associated factor 17(DCAF17)                                    |                                  |                                                        |                                                                                                                                |
| 4043              | LDL receptor related protein associated protein 1(LRPAP1)                     |                                  |                                                        | hsa04979:Cholesterol metabolism,                                                                                               |
| 254956            | MORN repeat containing 5(MORN5)                                               |                                  |                                                        |                                                                                                                                |
| 100532724         | NPHP3-ACAD11 readthrough (NMD candidate)(NPHP3-ACAD11)                        |                                  |                                                        |                                                                                                                                |
| 60561             | RAD50 interactor 1(RINT1)                                                     |                                  |                                                        |                                                                                                                                |
| 84193             | SET domain containing 3, actin histidine methyltransferase(SETD3)             |                                  |                                                        |                                                                                                                                |
| 10629             | TATA-box binding protein associated factor 6 like(TAF6L)                      |                                  |                                                        | hsa03022:Basal transcription factors,                                                                                          |
| 80315             | cytoplasmic polyadenylation element binding protein 4(CPEB4)                  |                                  |                                                        | hsa04114:Oocyte meiosis,hsa04914:Progesterone-mediated oocyte maturation,                                                      |
| 1770              | dynein axonemal heavy chain 9(DNAH9)                                          |                                  |                                                        | hsa05014:Amyotrophic lateral sclerosis,hsa05016:Huntington disease,hsa05022:Pathways of neurodegeneration - multiple diseases, |
| 10691             | glucocorticoid modulatory element binding protein 1(GMEB1)                    |                                  |                                                        |                                                                                                                                |
| 7184              | heat shock protein 90 beta family member 1(HSP90B1)                           |                                  |                                                        | hsa04141:Protein processing in endoplasmic reticulum, hsa04151:PI3K-Akt signaling pathway, etc.                                |
| 84263             | hydroxysteroid dehydrogenase like 2(HSDL2)                                    |                                  |                                                        |                                                                                                                                |
| 9767              | jade family PHD finger 3(JADE3)                                               |                                  |                                                        |                                                                                                                                |
| 64779             | methenyltetrahydrofolate synthetase domain containing(MTHFSD)                 |                                  |                                                        |                                                                                                                                |
| 79605             | piggyBac transposable element derived 5(PGBD5)                                |                                  |                                                        |                                                                                                                                |
| 5588              | protein kinase C theta(PRKCQ)                                                 |                                  | h_keratinocytePathway:Keratinocyte Differentiation,    | hsa04064:NF-kappa B signaling pathway, hsa04660:T cell receptor signaling pathway, etc.                                        |
| 85415             | rhophilin Rho GTPase binding protein 2(RHPN2)                                 |                                  |                                                        |                                                                                                                                |
| 152579            | sec1 family domain containing 2(SCFD2)                                        |                                  |                                                        |                                                                                                                                |
