# Supplementary material for: Transcriptomes of Injured Lamprey Axon Tips: Single-Cell RNA-Seq Suggests Differential Involvement of MAPK Signaling Pathways in Axon Retraction and Regeneration after Spinal Cord Injury
Source: MDPI journal article supplement (doi:10.3390/cells11152320), 2022-07-27
Supplement: s1 [file s1]

| Cytoskeleton   |                                                                                       |
|----------------|---------------------------------------------------------------------------------------|
| ENTREZ_GENE_ID | GENE NAME                                                                             |
| 54828          | BCAS3, microtubule associated cell migration factor(BCAS3)                            |
| 598            | BCL2 like 1(BCL2L1)                                                                   |
| 26005          | C2 calcium dependent domain containing 3(C2CD3)                                       |
| 23586          | DExD/H-box helicase 58(DDX58)                                                         |
| 23194          | F-box and leucine rich repeat protein 7(FBXL7)                                        |
| 55691          | FERM domain containing 4A(FRMD4A)                                                     |
| 2242           | FES proto-oncogene, tyrosine kinase(FES)                                              |
| 2314           | FLII, actin remodeling protein(FLII)                                                  |
| 85302          | Fas binding factor 1(FBF1)                                                            |
| 54801          | HAUS augmin like complex subunit 6(HAUS6)                                             |
| 10198          | M-phase phosphoprotein 9(MPHOSPH9)                                                    |
| 4751           | NIMA related kinase 2(NEK2)                                                           |
| 134492         | NudC domain containing 2(NUDCD2)                                                      |
| 4218           | RAB8A, member RAS oncogene family(RAB8A)                                              |
| 5888           | RAD51 recombinase(RAD51)                                                              |
| 84934          | RBPJ interacting and tubulin associated 1(RITA1)                                      |
| 6093           | Rho associated coiled-coil containing protein kinase 1(ROCK1)                         |
| 8607           | RuvB like AAA ATPase 1(RUVBL1)                                                        |
| 8717           | TNFRSF1A associated via death domain(TRADD)                                           |
| 11078          | TRIO and F-actin binding protein(TRIOBP)                                              |
| 57728          | WD repeat domain 19(WDR19)                                                            |
| 10152          | abl interactor 2(ABI2)                                                                |
| 273            | amphiphysin(AMPH)                                                                     |
| 54518          | amyloid beta precursor protein binding family B member 1 interacting protein(APBB1IP) |
| 1499           | catenin beta 1(CTNNB1)                                                                |
| 201161         | centromere protein V(CENPV)                                                           |
| 201134         | centrosomal protein 112(CEP112)                                                       |
| 145508         | centrosomal protein 128(CEP128)                                                       |
| 80254          | centrosomal protein 63(CEP63)                                                         |
| 10575          | chaperonin containing TCP1 subunit 4(CCT4)                                            |
| 115948         | coiled-coil domain containing 151(CCDC151)                                            |
| 23332          | cytoplasmic linker associated protein 1(CLASP1)                                       |
| 1794           | dedicator of cytokinesis 2(DOCK2)                                                     |
| 23268          | dynamitin binding protein(DNMBP)                                                      |
| 83450          | dynein regulatory complex subunit 3(DRC3)                                             |
| 1605           | dystroglycan 1(DAG1)                                                                  |
| 256364         | echinoderm microtubule associated protein like 3(EML3)                                |
| 56776          | formin 2(FMN2)                                                                        |
| 9270           | integrin subunit beta 1 binding protein 1(ITGB1BP1)                                   |
| 8100           | intraflagellar transport 88(IFT88)                                                    |
| 10300          | katanin regulatory subunit B1(KATNB1)                                                 |
| 11275          | kelch like family member 2(KLHL2)                                                     |
| 56992          | kinesin family member 15(KIF15)                                                       |
| 89953          | kinesin light chain 4(KLC4)                                                           |
| 9735           | kinetochore associated 1(KNTC1)                                                       |
| 9112           | metastasis associated 1(MTA1)                                                         |
| 4650           | myosin IXB(MYO9B)                                                                     |
| 2908           | nuclear receptor subfamily 3 group C member 1(NR3C1)                                  |
| 64098          | parvin gamma(PARVG)                                                                   |
| 5493           | periplakin(PPL)                                                                       |
| 26499          | pleckstrin 2(PLEK2)                                                                   |
| 143            | poly(ADP-ribose) polymerase family member 4(PARP4)                                    |
| 79834          | pseudopodium enriched atypical kinase 1(PEAK1)                                        |
| 51115          | regulator of microtubule dynamics 1(RMDN1)                                            |
| 25897          | ring finger protein 19A, RBR E3 ubiquitin protein ligase(RNF19A)                      |
| 6443           | sarcoglycan beta(SGCB)                                                                |
| 57477          | shroom family member 4(SHROOM4)                                                       |
| 22933          | sirtuin 2(SIRT2)                                                                      |
| 6683           | spastin(SPAST)                                                                        |
| 6712           | spectrin beta, non-erythrocytic 2(SPTBN2)                                             |
| 79582          | sperm associated antigen 16(SPAG16)                                                   |
| 200162         | sperm associated antigen 17(SPAG17)                                                   |
| 25876          | sperm flagellar 1(SPEF1)                                                              |
| 2040           | stomatin(STOM)                                                                        |
| 54221          | syntrophin gamma 2(SNTG2)                                                             |
| 55761          | tetratricopeptide repeat domain 17(TTC17)                                             |
| 79809          | tetratricopeptide repeat domain 21B(TTC21B)                                           |
| 23331          | tetratricopeptide repeat domain 28(TTC28)                                             |
| 9321           | thyroid hormone receptor interactor 11(TRIP11)                                        |
| 11011          | tousled like kinase 2(TLK2)                                                           |
| 91147          | transmembrane protein 67(TMEM67)                                                      |
| 7170           | tropomyosin 3(TPM3)                                                                   |
| 10844          | tubulin gamma complex associated protein 2(TUBGCP2)                                   |
| 23093          | tubulin tyrosine ligase like 5(TTL5)                                                  |
| 23503          | zinc finger FYVE-type containing 26(ZFYVE26)                                          |
| 51364          | zinc finger MYND-type containing 10(ZMYND10)                                          |

| mRNA splicing  |                                                                            |
|----------------|----------------------------------------------------------------------------|
| ENTREZ_GENE_ID | GENE NAME                                                                  |
| 51202          | DEAD-box helicase 47(DDX47)                                                |
| 11157          | LSM6 homolog, U6 small nuclear RNA and mRNA degradation associated(LSM6)   |
| 51747          | LUC7 like 3 pre-mRNA splicing factor(LUC7L3)                               |
| 84991          | RNA binding motif protein 17(RBM17)                                        |
| 58517          | RNA binding motif protein 25(RBM25)                                        |
| 9169           | SR-related CTD associated factor 11(SCAF11)                                |
| 23517          | Ski2 like RNA helicase 2(SKIV2L2)                                          |
| 79650          | U6 snRNA biogenesis phosphodiesterase 1(USB1)                              |
| 51729          | WW domain binding protein 11(WBP11)                                        |
| 56949          | XPA binding protein 2(XAB2)                                                |
| 22794          | cancer susceptibility candidate 3(CASC3)                                   |
| 708            | complement C1q binding protein(C1QBP)                                      |
| 51340          | crooked neck pre-mRNA splicing factor 1(CRNKL1)                            |
| 10150          | muscleblind like splicing regulator 2(MBNL2)                               |
| 55015          | pre-mRNA processing factor 39(PRPF39)                                      |
| 24148          | pre-mRNA processing factor 6(PRPF6)                                        |
| 11171          | serine/threonine kinase receptor associated protein(STRAP)                 |
| 9410           | small nuclear ribonucleoprotein U5 subunit 40(SNRNP40)                     |
| 10262          | splicing factor 3b subunit 4(SF3B4)                                        |
| 9092           | squamous cell carcinoma antigen recognized by T-cells 1(SART1)             |
| 8233           | zinc finger CCCH-type, RNA binding motif and serine/arginine rich 2(ZRSR2) |

| Protein biosynthesis |                                                                   |
|----------------------|-------------------------------------------------------------------|
| ENTREZ_GENE_ID       | GENE NAME                                                         |
| 60558                | GUF1 homolog, GTPase(GUF1)                                        |
| 6829                 | SPT5 homolog, DSIF elongation factor subunit(SUPT5H)              |
| 80325                | ankyrin repeat and BTB domain containing 1(ABTB1)                 |
| 57038                | arginyl-tRNA synthetase 2, mitochondrial(RARS2)                   |
| 55157                | aspartyl-tRNA synthetase 2, mitochondrial(DARS2)                  |
| 1615                 | aspartyl-tRNA synthetase(DARS)                                    |
| 8894                 | eukaryotic translation initiation factor 2 subunit beta(EIF2S2)   |
| 83939                | eukaryotic translation initiation factor 2A(EIF2A)                |
| 1967                 | eukaryotic translation initiation factor 2B subunit alpha(EIF2B1) |
| 8665                 | eukaryotic translation initiation factor 3 subunit F(EIF3F)       |
| 1975                 | eukaryotic translation initiation factor 4B(EIF4B)                |
| 1983                 | eukaryotic translation initiation factor 5(EIF5)                  |
| 54516                | mitochondrial translational release factor 1 like(MTRF1L)         |
| 2193                 | phenylalanyl-tRNA synthetase alpha subunit(FARSA)                 |
| 25973                | prolyl-tRNA synthetase 2, mitochondrial (putative)(PARS2)         |
| 7453                 | tryptophanyl-tRNA synthetase(WARS)                                |

| Ribosome biogenesis in eukaryotes |                                                           |
|-----------------------------------|-----------------------------------------------------------|
| ENTREZ_GENE_ID                    | GENE NAME                                                 |
| 22907                             | DExH-box helicase 30(DHX30)                               |
| 51077                             | FCF1 rRNA-processing protein(FCF1)                        |
| 55127                             | HEAT repeat containing 1(HEATR1)                          |
| 387338                            | NOP2/Sun RNA methyltransferase family member 4(NSUN4)     |
| 51602                             | NOP58 ribonucleoprotein(NOP58)                            |
| 708                               | complement C1q binding protein(C1QBP)                     |
| 81875                             | interferon stimulated exonuclease gene 20 like 2(ISG20L2) |
| 4931                              | nuclear VCP-like(NVL)                                     |
| 23212                             | ribosome biogenesis regulator homolog(RRS1)               |

| rRNA processing |                                                                          |
|-----------------|--------------------------------------------------------------------------|
| ENTREZ_GENE_ID  | GENE NAME                                                                |
| 51202           | DEAD-box helicase 47(DDX47)                                              |
| 22894           | DIS3 homolog, exosome endoribonuclease and 3'-5' exoribonuclease(DIS3)   |
| 51077           | FCF1 rRNA-processing protein(FCF1)                                       |
| 55127           | HEAT repeat containing 1(HEATR1)                                         |
| 11157           | LSM6 homolog, U6 small nuclear RNA and mRNA degradation associated(LSM6) |
| 387338          | NOP2/Sun RNA methyltransferase family member 4(NSUN4)                    |
| 23517           | Ski2 like RNA helicase 2(SKIV2L2)                                        |
| 27340           | UTP20, small subunit processome component(UTP20)                         |
| 51729           | WW domain binding protein 11(WBP11)                                      |
| 23016           | exosome component 7(EXOSC7)                                              |
| 11340           | exosome component 8(EXOSC8)                                              |
| 5393            | exosome component 9(EXOSC9)                                              |
| 2091            | fibrillarin(FBL)                                                         |
| 25926           | nucleolar protein 11(NOL11)                                              |

| mRNA processing |                                                                            |
|-----------------|----------------------------------------------------------------------------|
| ENTREZ_GENE_ID  | GENE NAME                                                                  |
| 51202           | DEAD-box helicase 47(DDX47)                                                |
| 22944           | Kin17 DNA and RNA binding protein(KIN)                                     |
| 11157           | LSM6 homolog, U6 small nuclear RNA and mRNA degradation associated(LSM6)   |
| 51747           | LUC7 like 3 pre-mRNA splicing factor(LUC7L3)                               |
| 84991           | RNA binding motif protein 17(RBM17)                                        |
| 58517           | RNA binding motif protein 25(RBM25)                                        |
| 9169            | SR-related CTD associated factor 11(SCAF11)                                |
| 23517           | Ski2 like RNA helicase 2(SKIV2L2)                                          |
| 79650           | U6 snRNA biogenesis phosphodiesterase 1(USB1)                              |
| 51729           | WW domain binding protein 11(WBP11)                                        |
| 56949           | XPA binding protein 2(XAB2)                                                |
| 22794           | cancer susceptibility candidate 3(CASC3)                                   |
| 55783           | cap methyltransferase 2(CMTR2)                                             |
| 10978           | cleavage and polyadenylation factor I subunit 1(CLP1)                      |
| 29894           | cleavage and polyadenylation specific factor 1(CPSF1)                      |
| 708             | complement C1q binding protein(C1QBP)                                      |
| 51340           | crooked neck pre-mRNA splicing factor 1(CRNKL1)                            |
| 10150           | muscleblind like splicing regulator 2(MBNL2)                               |
| 79810           | pentatricopeptide repeat domain 2(PTCD2)                                   |
| 55015           | pre-mRNA processing factor 39(PRPF39)                                      |
| 24148           | pre-mRNA processing factor 6(PRPF6)                                        |
| 11171           | serine/threonine kinase receptor associated protein(STRAP)                 |
| 9410            | small nuclear ribonucleoprotein U5 subunit 40(SNRNP40)                     |
| 10262           | splicing factor 3b subunit 4(SF3B4)                                        |
| 9092            | squamous cell carcinoma antigen recognized by T-cells 1(SART1)             |
| 7884            | stem-loop binding protein(SLBP)                                            |
| 8233            | zinc finger CCCH-type, RNA binding motif and serine/arginine rich 2(ZRSR2) |

| tRNA processing |                                                                          |
|-----------------|--------------------------------------------------------------------------|
| ENTREZ_GENE_ID  | GENE NAME                                                                |
| 24140           | FtsJ RNA methyltransferase homolog 1 (E. coli)(FTSJ1)                    |
| 11157           | LSM6 homolog, U6 small nuclear RNA and mRNA degradation associated(LSM6) |
| 51493           | RNA 2',3'-cyclic phosphate and 5'-OH ligase(RTCB)                        |
| 10978           | cleavage and polyadenylation factor I subunit 1(CLP1)                    |
| 25821           | mitochondrial tRNA translation optimization 1(MTO1)                      |
| 150962          | pseudouridylyate synthase 10(PUS10)                                      |
| 54802           | tRNA isopentenyltransferase 1(TRIT1)                                     |
| 55621           | tRNA methyltransferase 1(TRMT1)                                          |
| 54482           | tRNA methyltransferase 13 homolog(TRMT13)                                |
| 152992          | tRNA methyltransferase 44 homolog (S. cerevisiae)(TRMT44)                |
| 55253           | tRNA-yW synthesizing protein 1 homolog(TYW1)                             |
| 129450          | tRNA-yW synthesizing protein 5(TYW5)                                     |

| RNA binding    |                                                  |
|----------------|--------------------------------------------------|
| ENTREZ_GENE_ID | GENE NAME                                        |
| 79026          | AHNAK nucleoprotein(AHNAK)                       |
| 23             | ATP binding cassette subfamily F member 1(ABCF1) |
| 84811          | BUD13 homolog(BUD13)                             |
| 22794          | CASC3 exon junction complex subunit(CASC3)       |
| 51202          | DEAD-box helicase 47(DDX47)                      |
| 54555          | DEAD-box helicase 49(DDX49)                      |



| mitochondrion  |                                                                       |        |                                                                                  |
|----------------|-----------------------------------------------------------------------|--------|----------------------------------------------------------------------------------|
| ENTREZ_GENE_ID | GENE NAME                                                             |        |                                                                                  |
| 3155           | 3-hydroxy-3-methylglutaryl-CoA lyase(HMGCL)                           | 56919  | DEAH-box helicase 33(DHX33)                                                      |
| 622            | 3-hydroxybutyrate dehydrogenase 1(BDH1)                               | 22907  | DExH-box helicase 30(DHX30)                                                      |
| 18             | 4-aminobutyrate aminotransferase(ABAT)                                | 2079   | ERH mRNA splicing and mitosis factor(ERH)                                        |
| 112817         | 4-hydroxy-2-oxoglutarate aldolase 1(HOGA1)                            | 51077  | FCF1 rRNA-processing protein(FCF1)                                               |
| 598            | BCL2 like 1(BCL2L1)                                                   | 55127  | HEAT repeat containing 1(HEATR1)                                                 |
| 284106         | CDGSH iron sulfur domain 3(CISD3)                                     | 84298  | LLP homolog, long-term synaptic facilitation factor(LLPH)                        |
| 22907          | DExH-box helicase 30(DHX30)                                           | 11157  | LSM6 homolog, U6 small nuclear RNA and mRNA degradation associated(LSM6)         |
| 3980           | DNA ligase 3(LIG3)                                                    | 51747  | LUC7 like 3 pre-mRNA splicing factor(LUC7L3)                                     |
| 3301           | DnaJ heat shock protein family (Hsp40) member A1(DNAJA1)              | 23517  | Mtr4 exosome RNA helicase(MTREX)                                                 |
| 2874           | G protein pathway suppressor 2(GPS2)                                  | 51602  | NOP58 ribonucleoprotein(NOP58)                                                   |
| 60558          | GTP binding elongation factor GUF1(GUF1)                              | 161424 | NOP9 nucleolar protein(NOP9)                                                     |
| 55127          | HEAT repeat containing 1(HEATR1)                                      | 5822   | PWP2 small subunit processome component(PWP2)                                    |
| 138151         | NACC family member 2(NACC2)                                           | 51493  | RNA 2',3'-cyclic phosphate and 5'-OH ligase(RTCB)                                |
| 4719           | NADH:ubiquinone oxidoreductase core subunit S1(NDUFS1)                | 58517  | RNA binding motif protein 25(RBM25)                                              |
| 60491          | NGG1 interacting factor 3 like 1(NIF3L1)                              | 155435 | RNA binding motif protein 33(RBM33)                                              |
| 10201          | NME/NM23 nucleoside diphosphate kinase 6(NME6)                        | 5431   | RNA polymerase II subunit B(POLR2B)                                              |
| 80224          | NUBP iron-sulfur cluster assembly factor, mitochondrial(NUBPL)        | 5442   | RNA polymerase mitochondrial(POLRMT)                                             |
| 4976           | OPA1 mitochondrial dynamin like GTPase(OPA1)                          | 84881  | RNA pseudouridine synthase D4(RPUSD4)                                            |
| 5888           | RAD51 recombinase(RAD51)                                              | 23168  | RTF1 homolog, Paf1/RNA polymerase II complex component(RTF1)                     |
| 5903           | RAN binding protein 2(RANBP2)                                         | 11196  | SEC23 interacting protein(SEC23IP)                                               |
| 25996          | RNA exonuclease 2(REXO2)                                              | 6829   | SPT5 homolog, DSIF elongation factor subunit(SUPT5H)                             |
| 5442           | RNA polymerase mitochondrial(POLRMT)                                  | 9169   | SR-related CTD associated factor 11(SCAF11)                                      |
| 84881          | RNA pseudouridine synthase D4(RPUSD4)                                 | 6734   | SRP receptor subunit alpha(SRPRA)                                                |
| 57154          | SMAD specific E3 ubiquitin protein ligase 1(SMURF1)                   | 5976   | UPF1 RNA helicase and ATPase(UPF1)                                               |
| 6687           | SPG7 matrix AAA peptidase subunit, paraplegin(SPG7)                   | 8615   | USO1 vesicle transport factor(USO1)                                              |
| 38             | acetyl-CoA acetyltransferase 1(ACAT1)                                 | 27340  | UTP20 small subunit processome component(UTP20)                                  |
| 10449          | acetyl-CoA acyltransferase 2(ACAA2)                                   | 51729  | WW domain binding protein 11(WBP11)                                              |
| 32             | acetyl-CoA carboxylase beta(ACACB)                                    | 10449  | acetyl-CoA acyltransferase 2(ACAA2)                                              |
| 48             | aconitase 1(ACO1)                                                     | 81     | actinin alpha 4(ACTN4)                                                           |
| 36             | acyl-CoA dehydrogenase short/branched chain(ACADSB)                   | 54882  | ankyrin repeat and KH domain containing 1(ANKHD1)                                |
| 79611          | acyl-CoA synthetase short chain family member 3(ACSS3)                | 57038  | arginyl-tRNA synthetase 2, mitochondrial(RARS2)                                  |
| 160428         | aldehyde dehydrogenase 1 family member L2(ALDH1L2)                    | 1615   | aspartyl-tRNA synthetase 1(DARS1)                                                |
| 8846           | alkB homolog 1, histone H2A dioxygenase(ALKBH1)                       | 1454   | casein kinase 1 epsilon(CSNK1E)                                                  |
| 221120         | alkB homolog 3, alpha-ketoglutarate dependent dioxygenase(ALKBH3)     | 10575  | chaperonin containing TCP1 subunit 4(CCT4)                                       |
| 57038          | arginyl-tRNA synthetase 2, mitochondrial(RARS2)                       | 255101 | cilia and flagella associated protein 65(CFAP65)                                 |
| 55157          | aspartyl-tRNA synthetase 2, mitochondrial(DARS2)                      | 26093  | coiled-coil domain containing 9(CCDC9)                                           |
| 10902          | bromodomain containing 8(BRD8)                                        | 51340  | crooked neck pre-mRNA splicing factor 1(CRNKL1)                                  |
| 8192           | caseinolytic mitochondrial matrix peptidase proteolytic subunit(CLPP) | 8894   | eukaryotic translation initiation factor 2 subunit beta(EIF2S2)                  |
| 841            | caspase 8(CASP8)                                                      | 1975   | eukaryotic translation initiation factor 4B(EIF4B)                               |
| 10087          | ceramide transporter 1(CERT1)                                         | 1983   | eukaryotic translation initiation factor 5(EIF5)                                 |
| 728568         | chromosome 12 open reading frame 73(C12orf73)                         | 5393   | exosome component 9(EXOSC9)                                                      |
| 708            | complement C1q binding protein(C1QBP)                                 | 2091   | fibrillarin(FBL)                                                                 |
| 1537           | cytochrome c1(CYC1)                                                   | 2804   | golgin B1(GOLGB1)                                                                |
| 5447           | cytochrome p450 oxidoreductase(POR)                                   | 3313   | heat shock protein family A (Hsp70) member 9(HSPA9)                              |
| 55101          | distal membrane arm assembly component 2(DMAC2)                       | 81875  | interferon stimulated exonuclease gene 20 like 2(ISG20L2)                        |
| 1892           | enoyl-CoA hydratase, short chain 1(ECHS1)                             | 10128  | leucine rich pentatricopeptide repeat containing(LRPPRC)                         |
| 55218          | exonuclease 3'-5' domain containing 2(EXD2)                           | 64928  | mitochondrial ribosomal protein L14(MRPL14)                                      |
| 3607           | forkhead box K2(FO XK2)                                               | 64951  | mitochondrial ribosomal protein S24(MRPS24)                                      |
| 2954           | glutathione S-transferase zeta 1(GSTZ1)                               | 64949  | mitochondrial ribosomal protein S26(MRPS26)                                      |
| 3313           | heat shock protein family A (Hsp70) member 9(HSPA9)                   | 25821  | mitochondrial tRNA translation optimization 1(MTO1)                              |
| 8520           | histone acetyltransferase 1(HAT1)                                     | 10150  | muscleblind like splicing regulator 2(MBNL2)                                     |
| 3416           | insulin degrading enzyme(IDE)                                         | 25983  | neuroguidin(NGDN)                                                                |
| 64135          | interferon induced with helicase C domain 1(IFIH1)                    | 51070  | nitric oxide synthase interacting protein(NOSIP)                                 |
| 3658           | iron responsive element binding protein 2(IREB2)                      | 4931   | nuclear VCP like(NVL)                                                            |
| 122961         | iron-sulfur cluster assembly 2(ISCA2)                                 | 25926  | nucleolar protein 11(NOL11)                                                      |
| 3419           | isocitrate dehydrogenase (NAD(+)) 3 catalytic subunit alpha(IDH3A)    | 4676   | nucleosome assembly protein 1 like 4(NAP1L4)                                     |
| 10128          | leucine rich pentatricopeptide repeat containing(LRPPRC)              | 79810  | pentatricopeptide repeat domain 2(PTCD2)                                         |
| 8513           | lipase F, gastric type(LIPF)                                          | 9360   | peptidylprolyl isomerase G(PPIG)                                                 |
| 64745          | methyltransferase like 17(METTL17)                                    | 2193   | phenylalanyl-tRNA synthetase subunit alpha(FARSA)                                |
| 23788          | mitochondrial carrier 2(MTCH2)                                        | 8761   | poly(A) binding protein cytoplasmic 4(PABPC4)                                    |
| 56181          | mitochondrial fission regulator 1 like(MTFR1L)                        | 5073   | poly(A)-specific ribonuclease(PARN)                                              |
| 64928          | mitochondrial ribosomal protein L14(MRPL14)                           | 24148  | pre-mRNA processing factor 6(PRPF6)                                              |
| 54948          | mitochondrial ribosomal protein L16(MRPL16)                           | 27341  | ribosomal RNA processing 7 homolog A(RRP7A)                                      |
| 6150           | mitochondrial ribosomal protein L23(MRPL23)                           | 23212  | ribosome biogenesis regulator 1 homolog(RRS1)                                    |
| 51263          | mitochondrial ribosomal protein L30(MRPL30)                           | 11171  | serine/threonine kinase receptor associated protein(STRAP)                       |
| 55168          | mitochondrial ribosomal protein S18A(MRPS18A)                         | 6729   | signal recognition particle 54(SRP54)                                            |
| 51116          | mitochondrial ribosomal protein S2(MRPS2)                             | 6731   | signal recognition particle 72(SRP72)                                            |
| 64951          | mitochondrial ribosomal protein S24(MRPS24)                           | 9410   | small nuclear ribonucleoprotein U5 subunit 40(SNRNP40)                           |
| 64432          | mitochondrial ribosomal protein S25(MRPS25)                           | 9092   | spliceosome associated factor 1, recruiter of U4/U6.U5 tri-snRNP(SART1)          |
| 64949          | mitochondrial ribosomal protein S26(MRPS26)                           | 10262  | splicing factor 3b subunit 4(SF3B4)                                              |
| 25821          | mitochondrial tRNA translation optimization 1(MTO1)                   | 7884   | stem-loop binding protein(SLBP)                                                  |
| 51102          | mitochondrial trans-2-enoyl-CoA reductase(MECR)                       | 55621  | tRNA methyltransferase 1(TRMT1)                                                  |
| 54516          | mitochondrial translation release factor 1 like(MTRF1L)               | 7019   | transcription factor A, mitochondrial(TFAM)                                      |
| 25983          | neuroguidin(NGDN)                                                     | 26608  | transducin beta like 2(TBL2)                                                     |
| 55335          | nipsnap homolog 3B(NIPSNAP3B)                                         | 9238   | transforming growth factor beta regulator 4(TBRG4)                               |
| 2908           | nuclear receptor subfamily 3 group C member 1(NR3C1)                  | 7531   | tyrosine 3-monooxygenase/tryptophan 5-monooxygenase activation protein epsilon(\ |
| 79810          | pentatricopeptide repeat domain 2(PTCD2)                              | 57602  | ubiquitin specific peptidase 36(USP36)                                           |
| 23761          | phosphatidylserine decarboxylase(PISD)                                | 85451  | unk zinc finger(UNK)                                                             |
| 23241          | phosphofurin acidic cluster sorting protein 2(PACS2)                  | 7415   | valosin containing protein(VCP)                                                  |
| 5264           | phytanoyl-CoA 2-hydroxylase(PHYH)                                     | 124245 | zinc finger CCCH-type containing 18(ZC3H18)                                      |
| 25973          | prolyl-tRNA synthetase 2, mitochondrial(PARS2)                        | 90441  | zinc finger protein 622(ZNF622)                                                  |
| 150962         | pseudouridine synthase 10(PUS10)                                      |        |                                                                                  |
| 10928          | ralA binding protein 1(RALBP1)                                        |        |                                                                                  |
| 55288          | ras homolog family member T1(RHOT1)                                   |        |                                                                                  |
| 84947          | serine active site containing 1(SERAC1)                               |        |                                                                                  |
| 6472           | serine hydroxymethyltransferase 2(SHMT2)                              |        |                                                                                  |
| 22933          | sirtuin 2(SIRT2)                                                      |        |                                                                                  |
| 84275          | solute carrier family 25 member 33(SLC25A33)                          |        |                                                                                  |
| 51629          | solute carrier family 25 member 39(SLC25A39)                          |        |                                                                                  |
| 132671         | spermatogenesis associated 18(SPATA18)                                |        |                                                                                  |
| 6770           | steroidogenic acute regulatory protein(STAR)                          |        |                                                                                  |
| 2040           | stomatin(STOM)                                                        |        |                                                                                  |
| 6389           | succinate dehydrogenase complex flavoprotein subunit A(SDHA)          |        |                                                                                  |
| 58472          | sulfide quinone oxidoreductase(SQOR)                                  |        |                                                                                  |
| 8773           | synaptosome associated protein 23(SNAP23)                             |        |                                                                                  |
| 54802          | tRNA isopentenyltransferase 1(TRIT1)                                  |        |                                                                                  |
| 54881          | testis expressed 10(TEX10)                                            |        |                                                                                  |
| 7019           | transcription factor A, mitochondrial(TFAM)                           |        |                                                                                  |
| 9238           | transforming growth factor beta regulator 4(TBRG4)                    |        |                                                                                  |
| 54968          | transmembrane protein 70(TMEM70)                                      |        |                                                                                  |

|       |                                                                   |
|-------|-------------------------------------------------------------------|
| 84300 | ubiquinol-cytochrome c reductase complex assembly factor 2(UQCC2) |
| 7384  | ubiquinol-cytochrome c reductase core protein 1(UQCRC1)           |
| 7350  | uncoupling protein 1(UCP1)                                        |
| 7351  | uncoupling protein 2(UCP2)                                        |
| 53349 | zinc finger FYVE-type containing 1(ZFYVE1)                        |
