# Supplementary figures and images for: Transcriptomes of Injured Lamprey Axon Tips: Single-Cell RNA-Seq Suggests Differential Involvement of MAPK Signaling Pathways in Axon Retraction and Regeneration after Spinal Cord Injury
Source: MDPI journal article supplement (doi:10.3390/cells11152320), 2022-07-27

**map3k2**

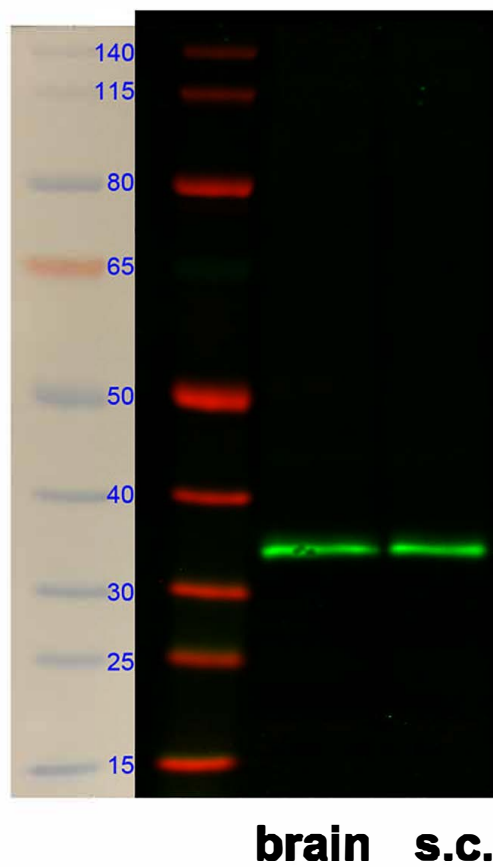

**csnk1e**

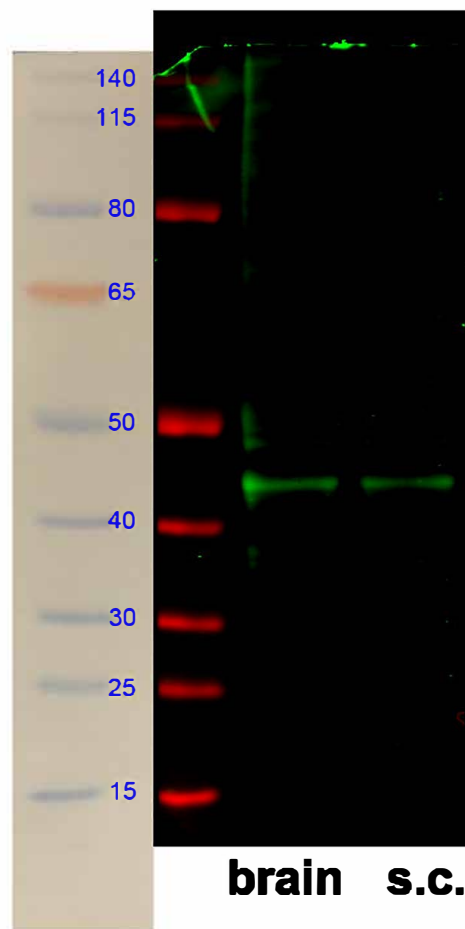

Supplement: s1 [file s1]

# Growing tips (10)

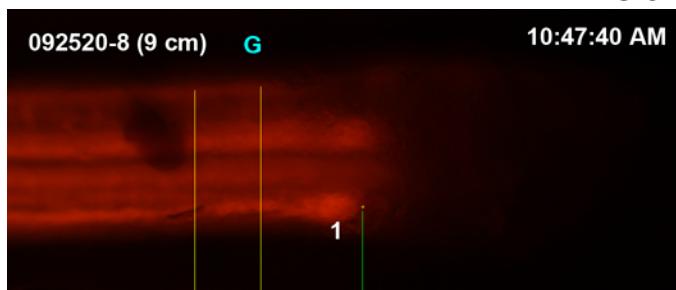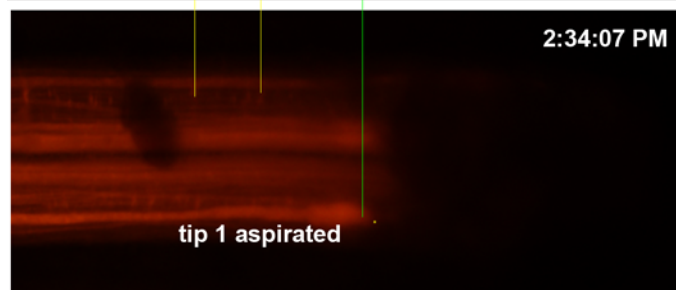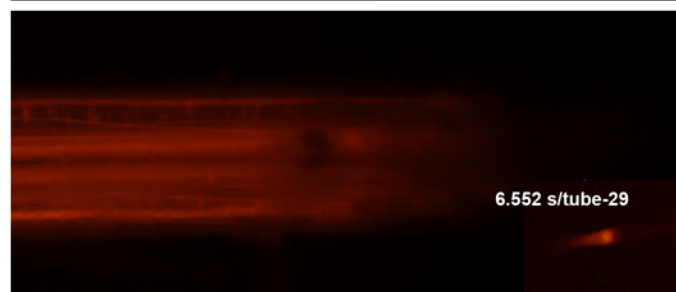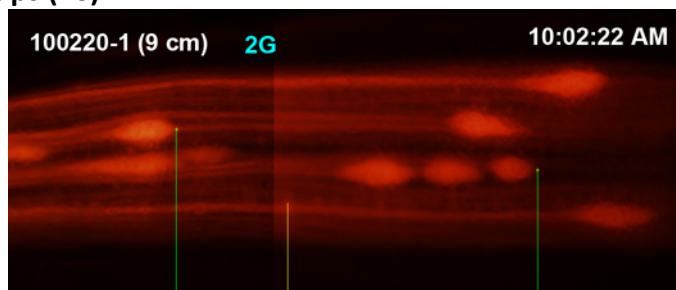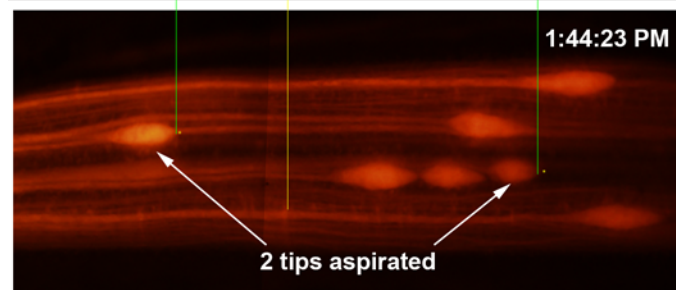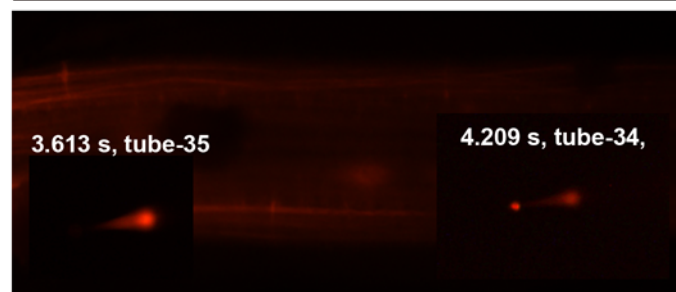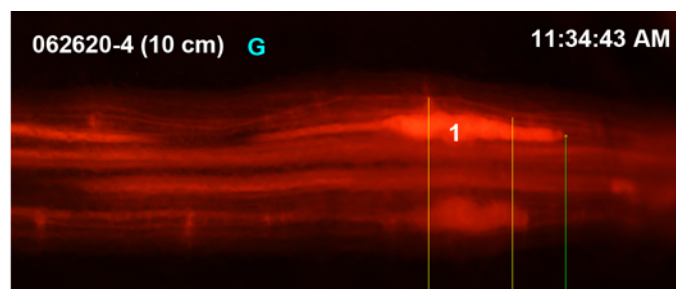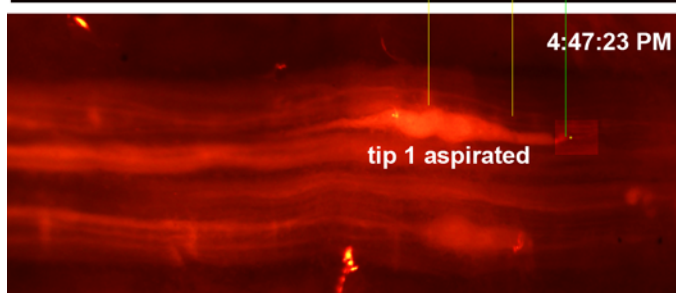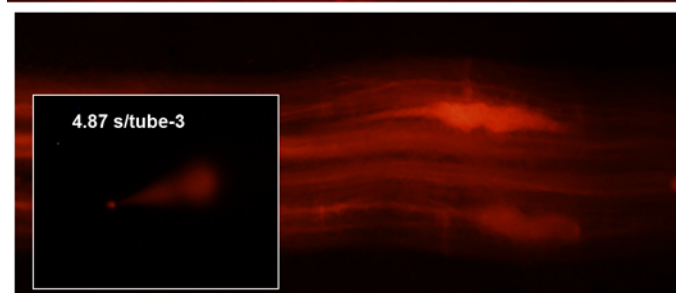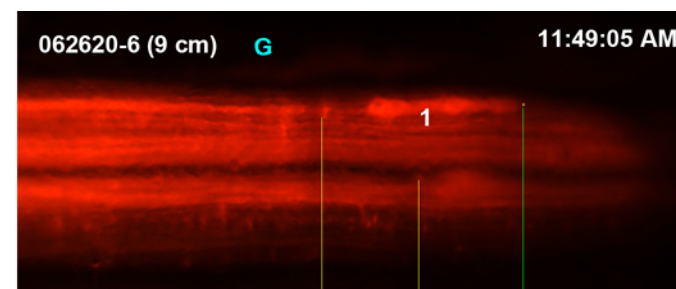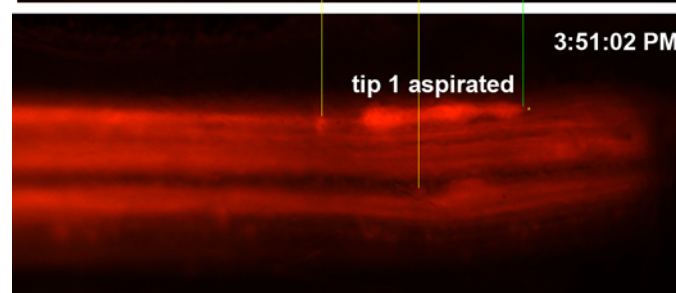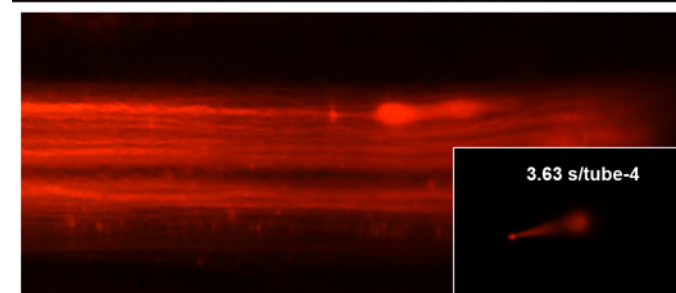

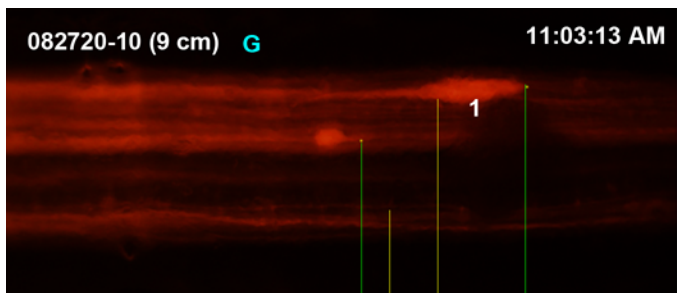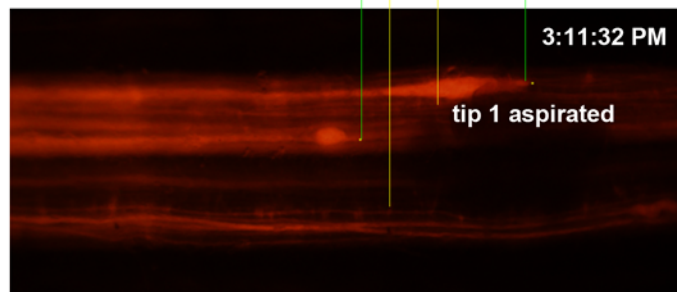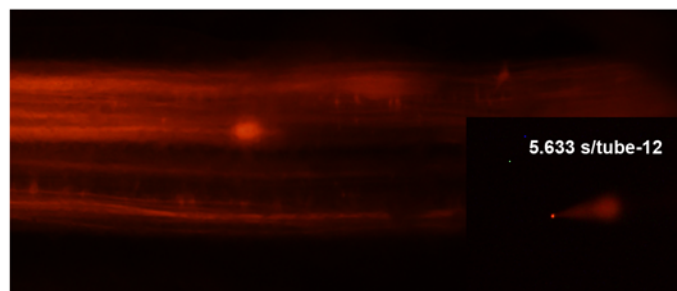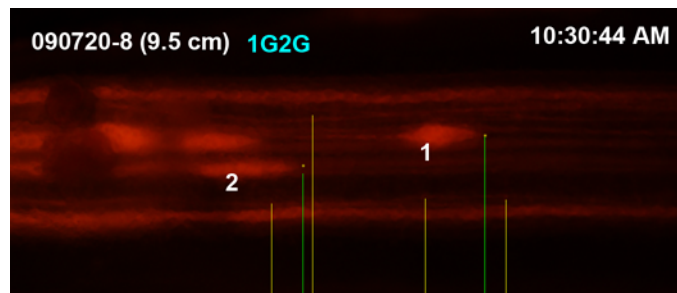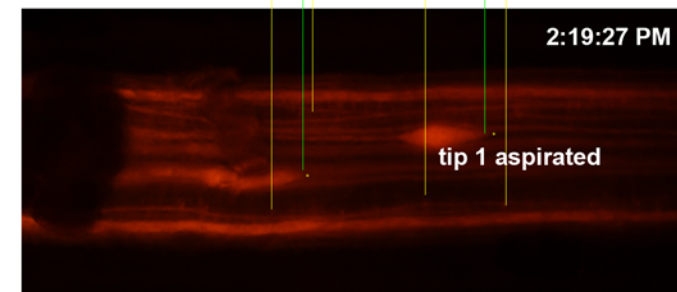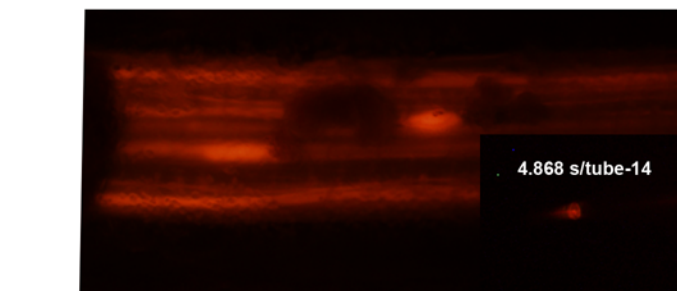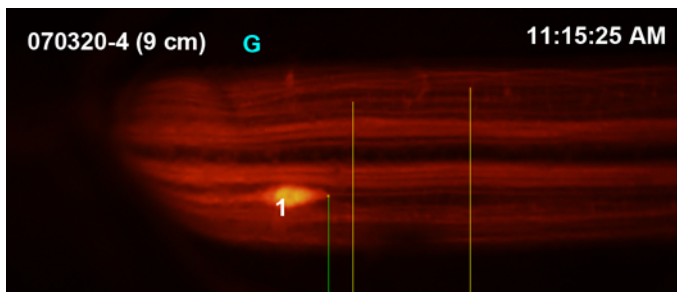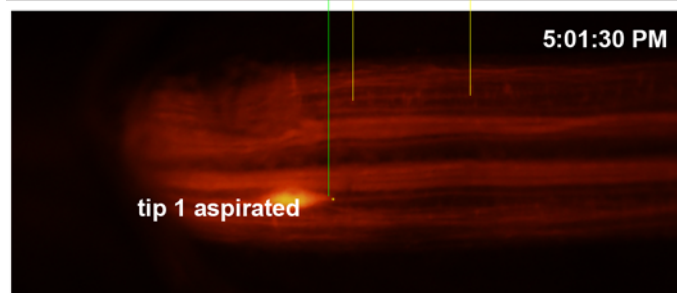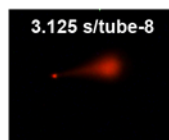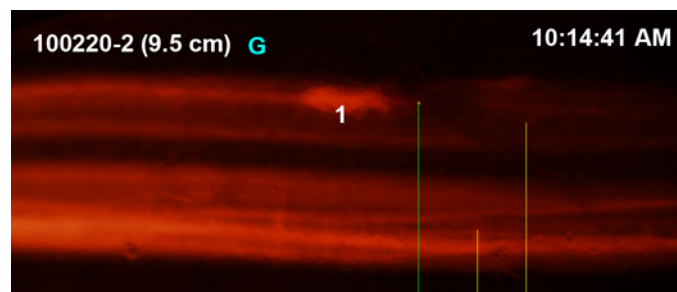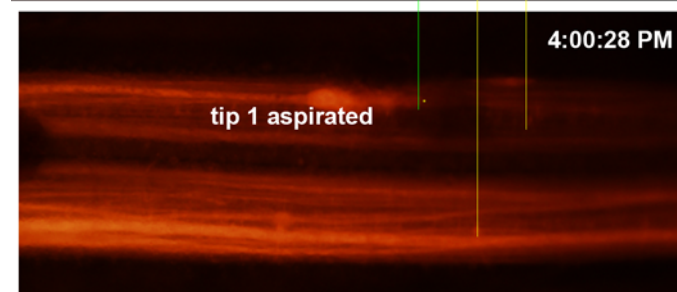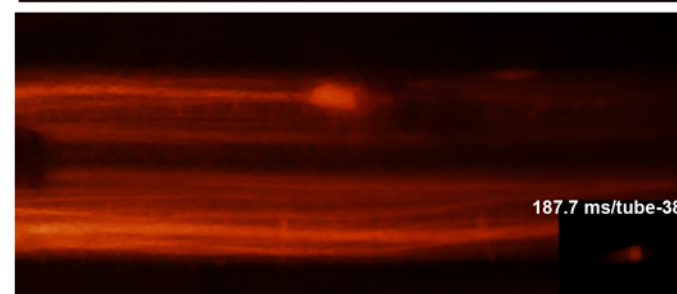

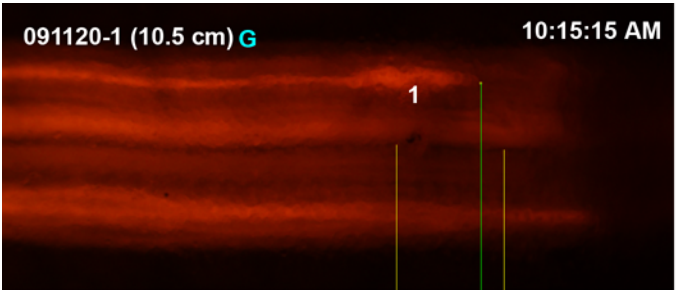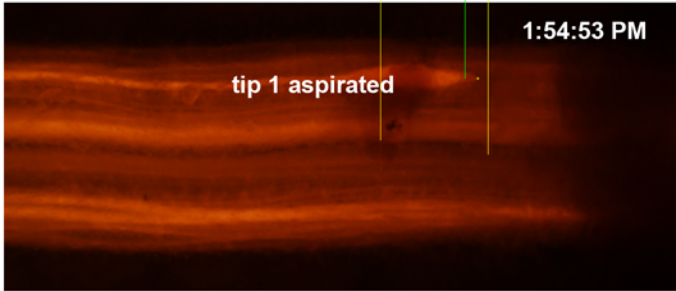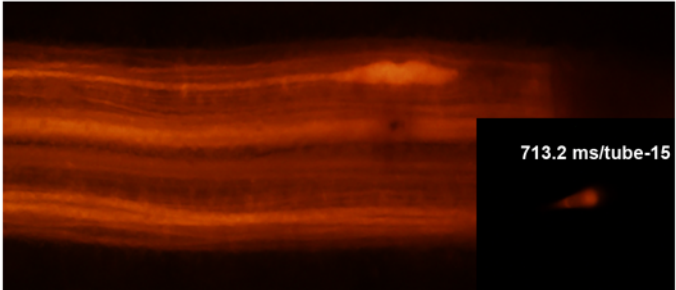



Static tips (9)

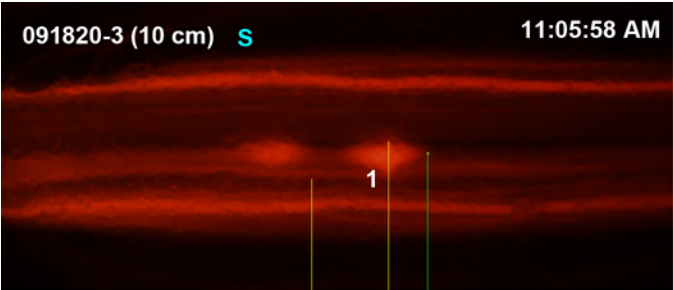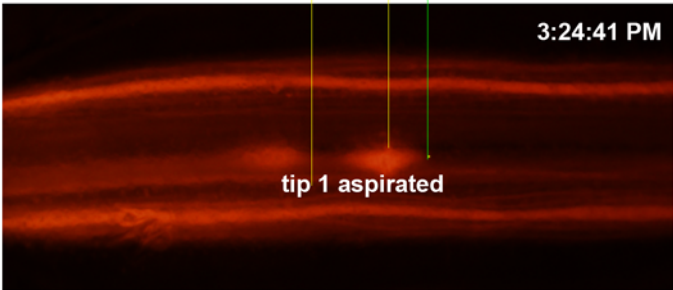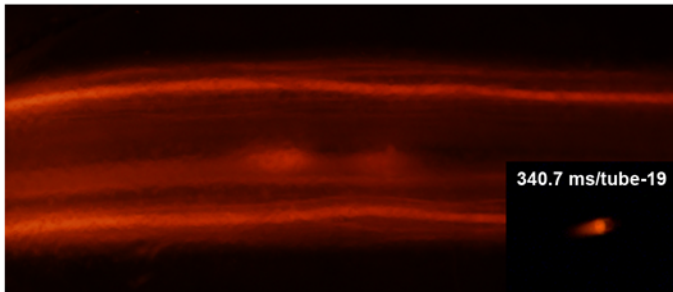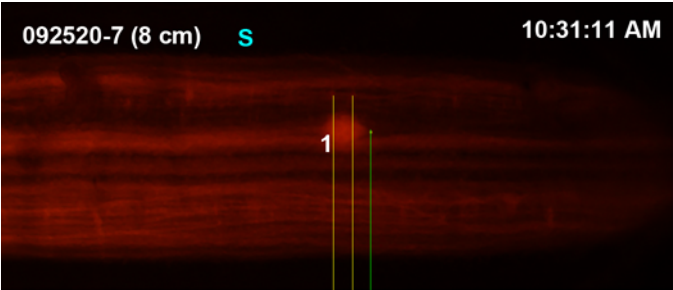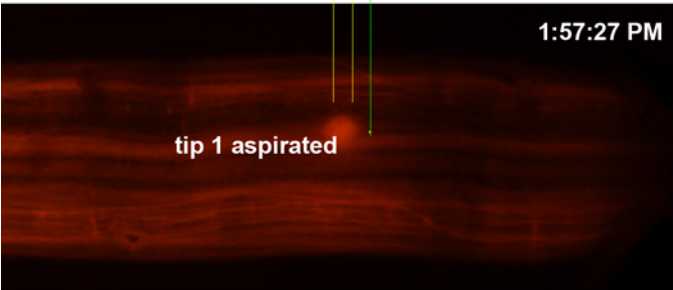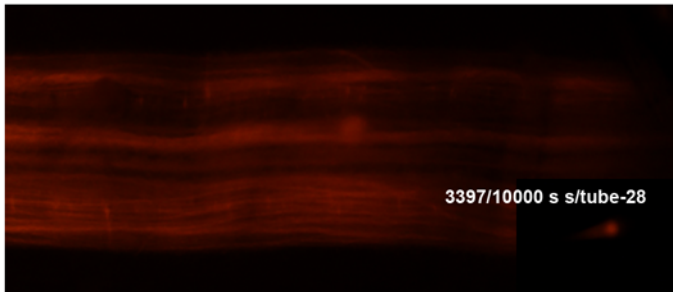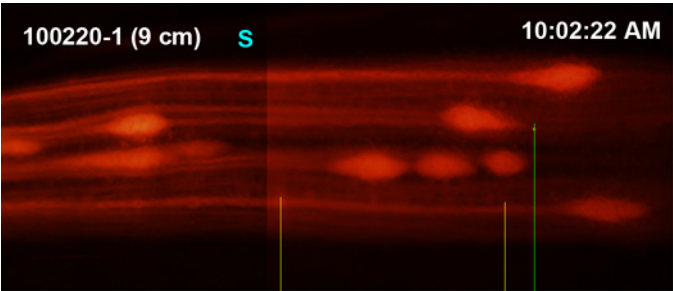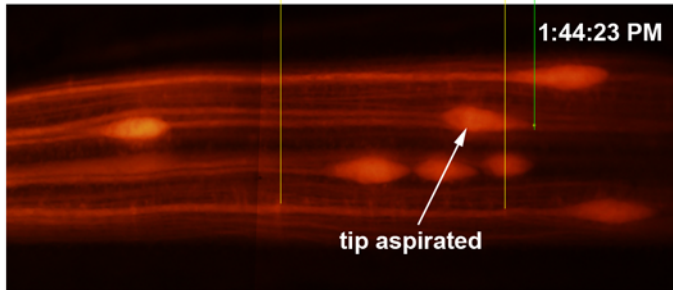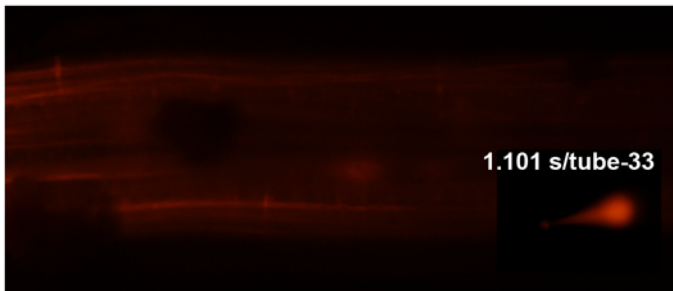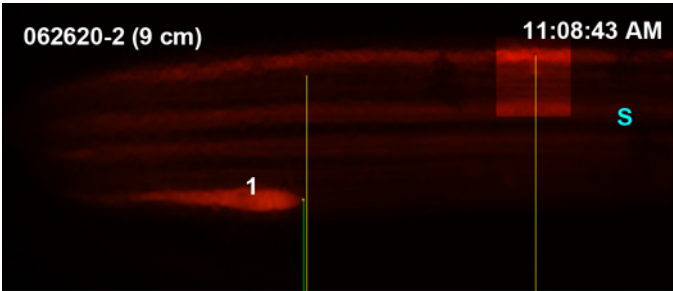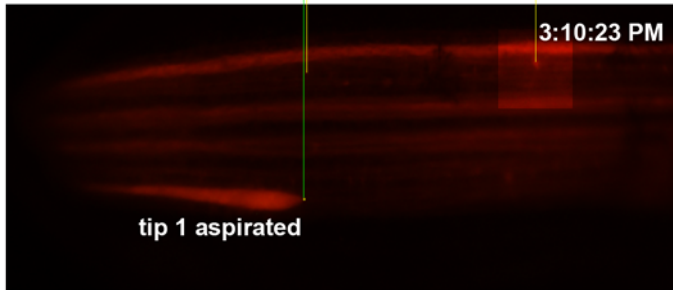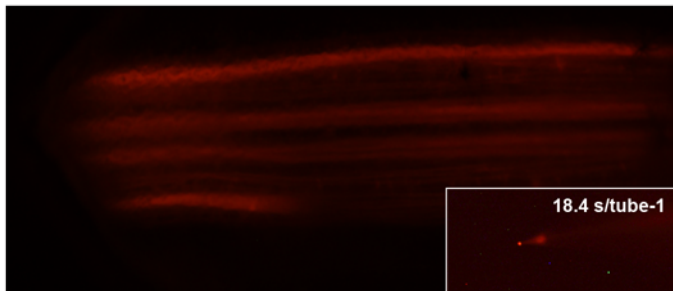



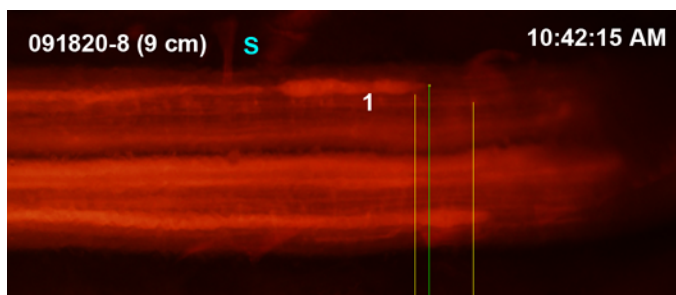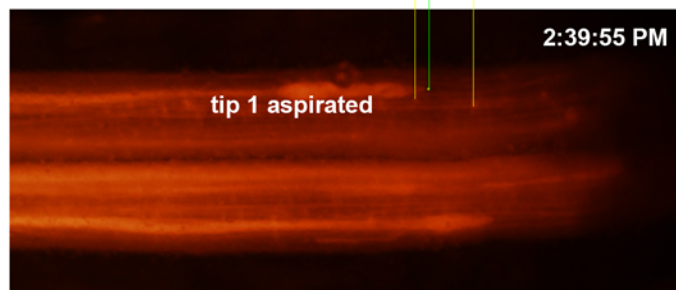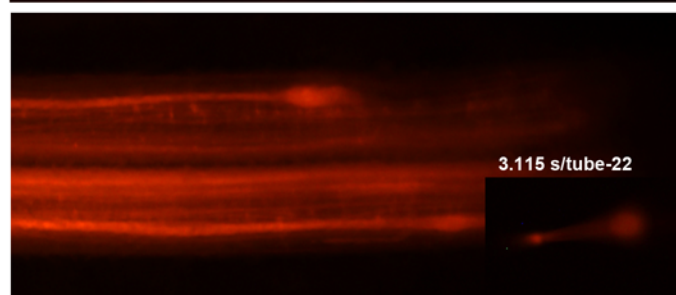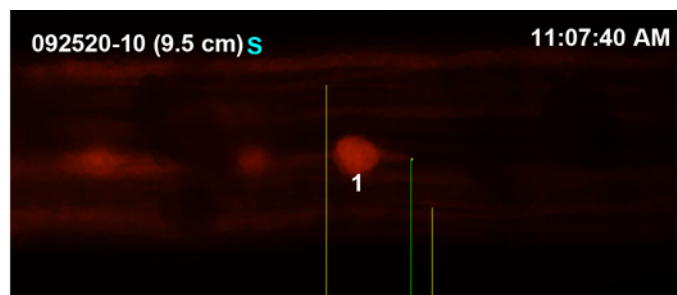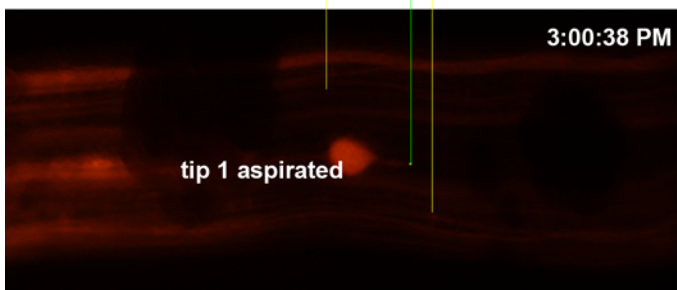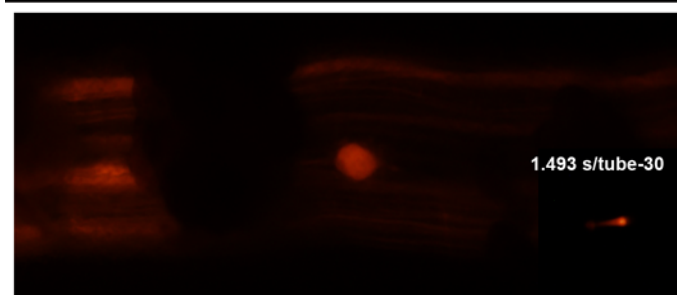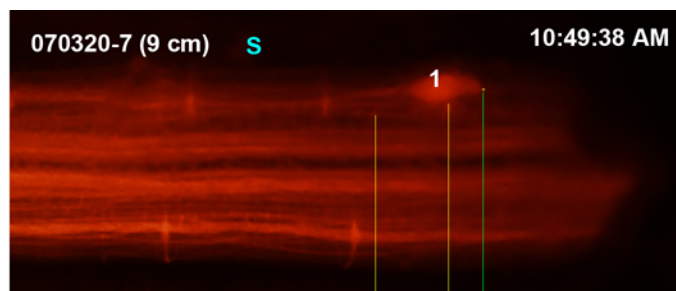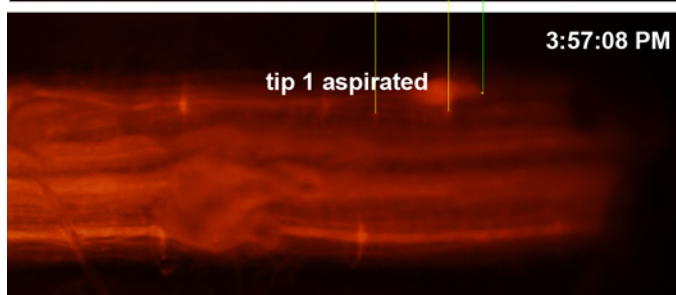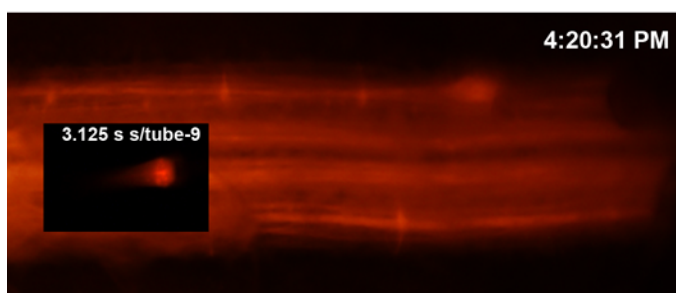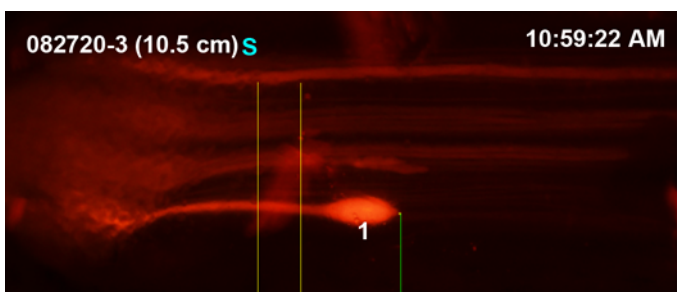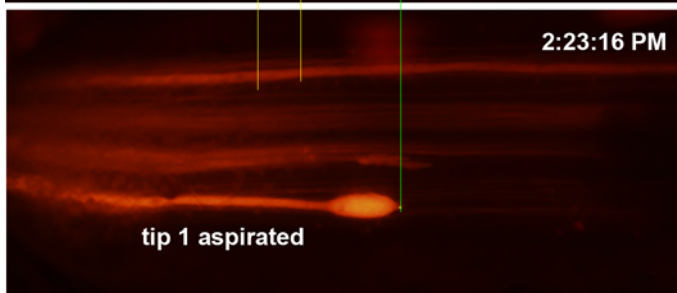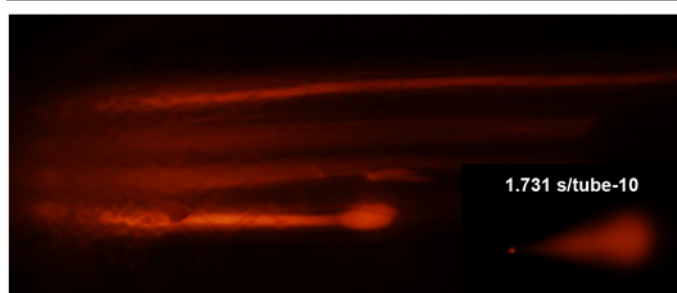

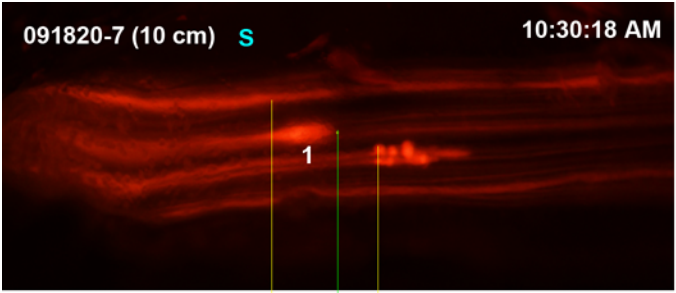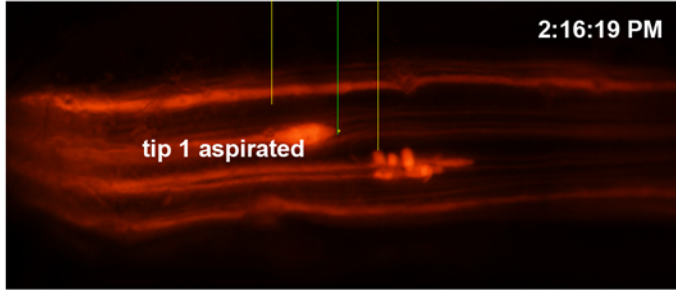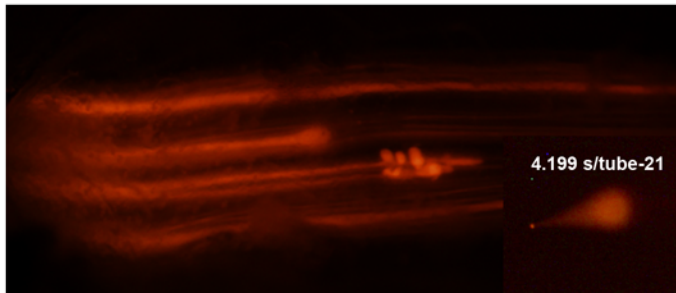

## Refracting tips (5)

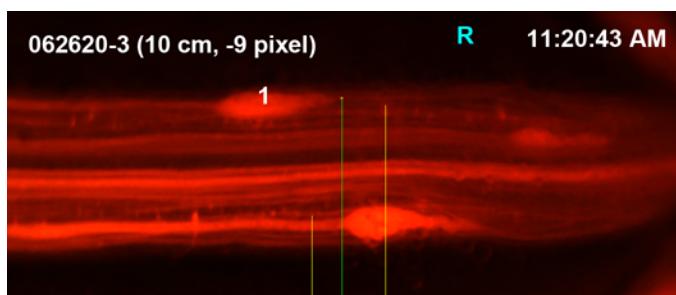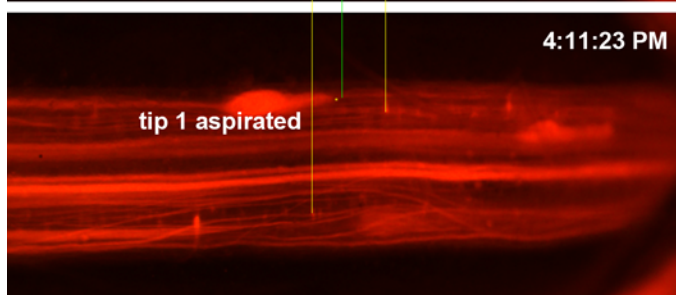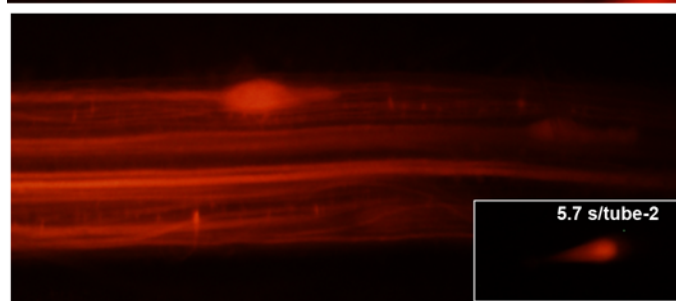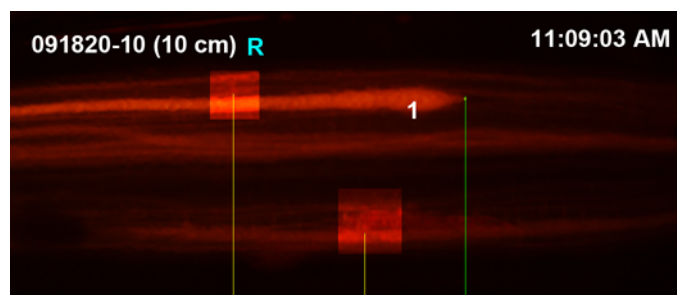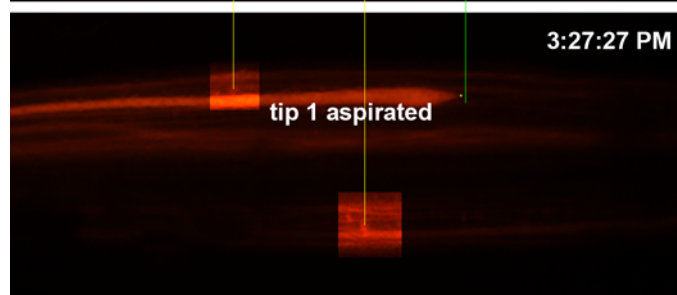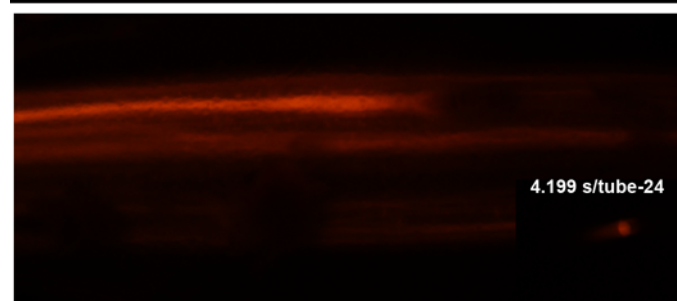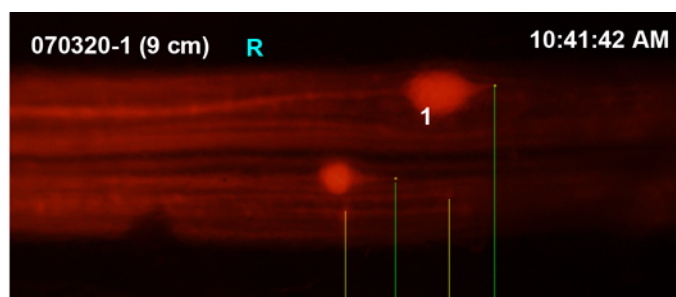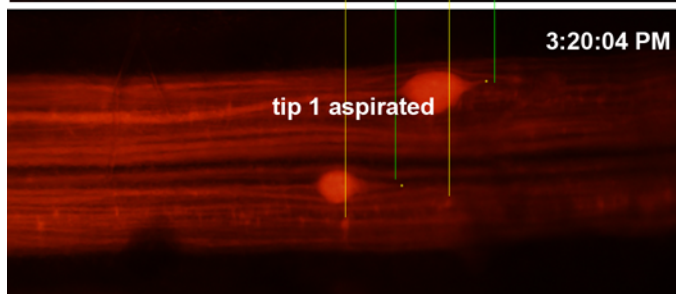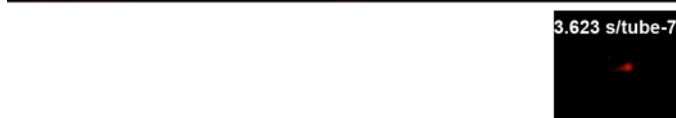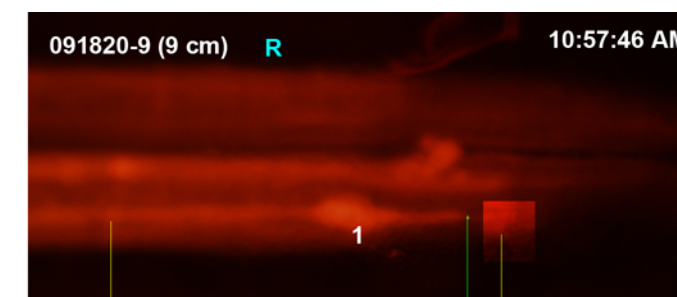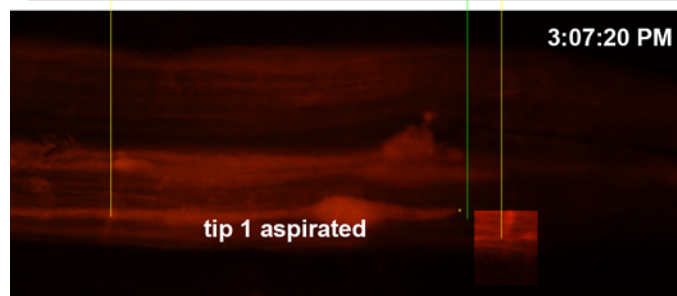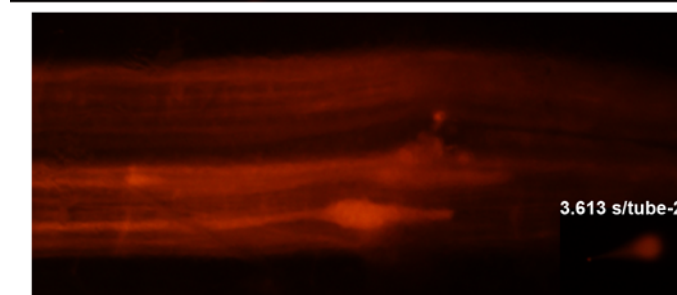



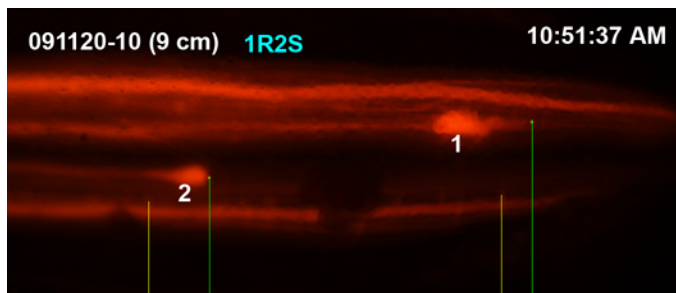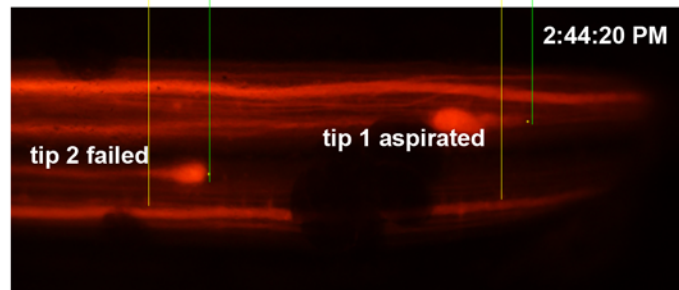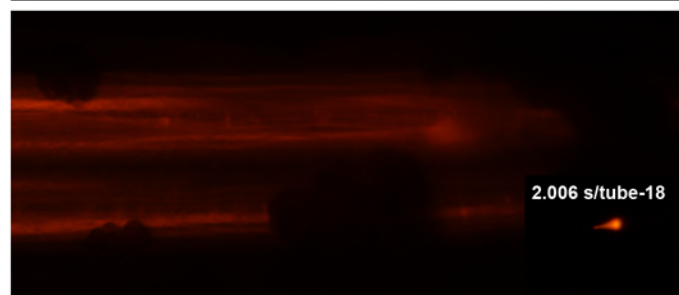

## Removed Samples (9)

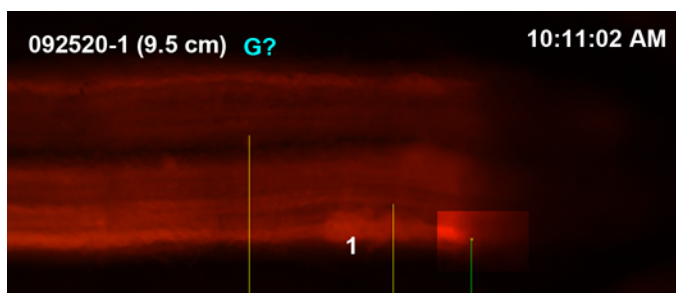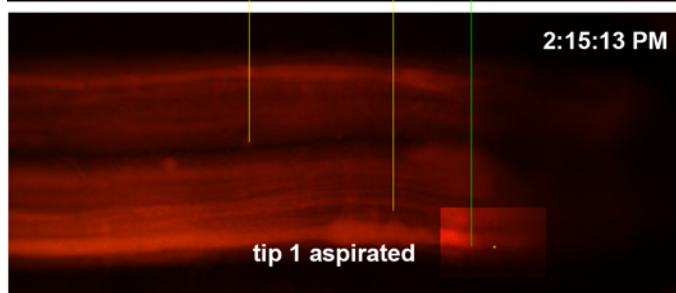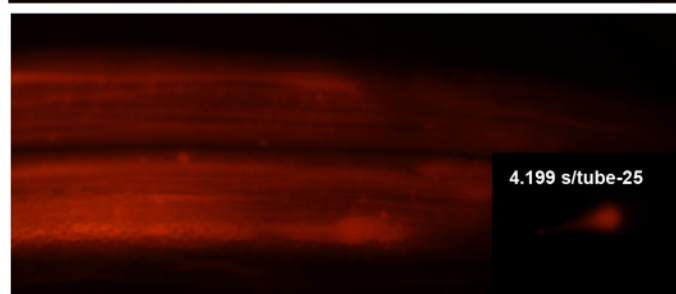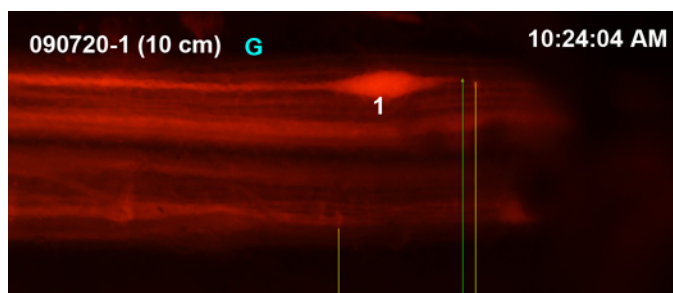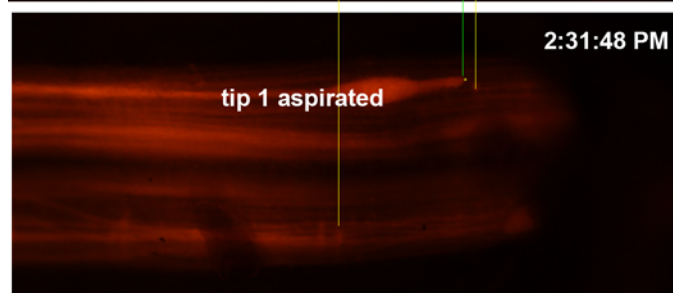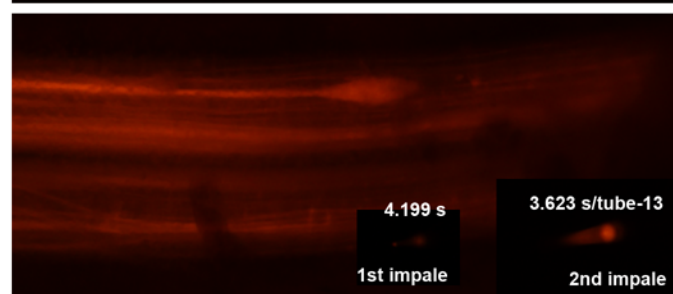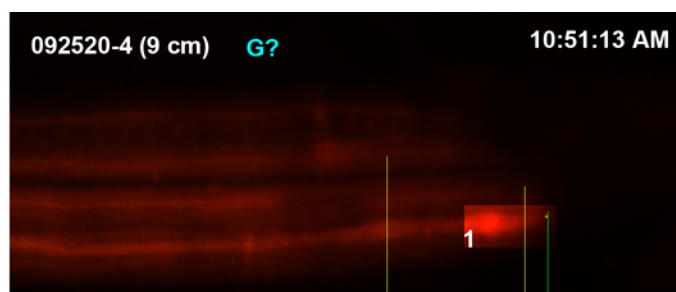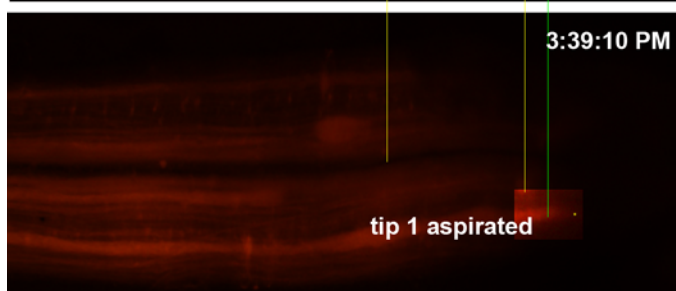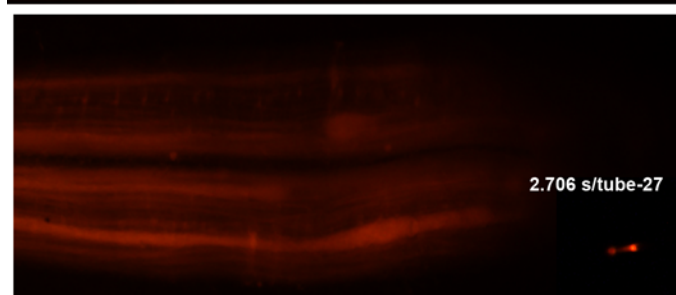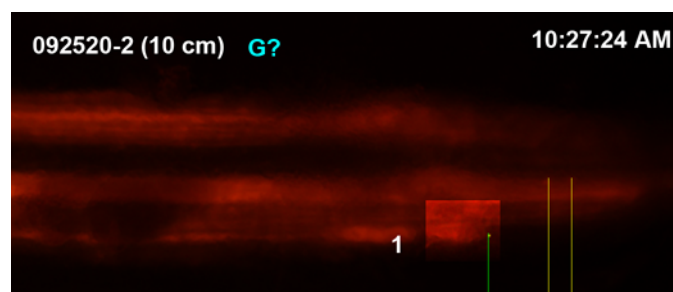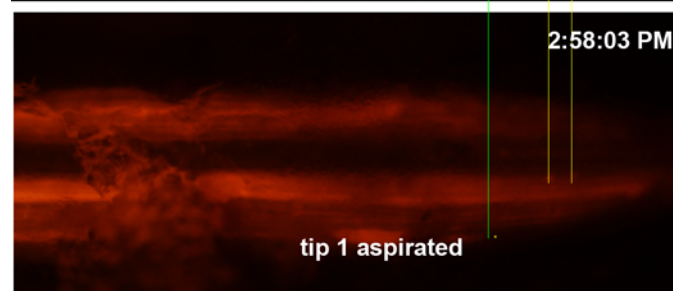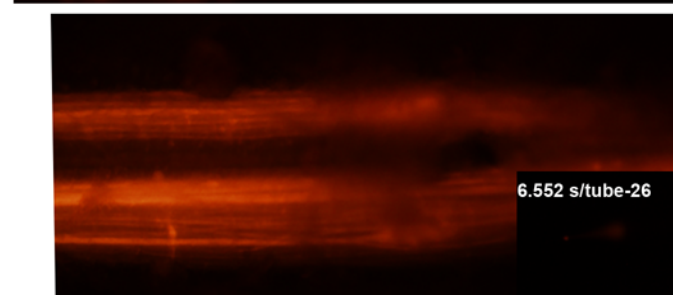

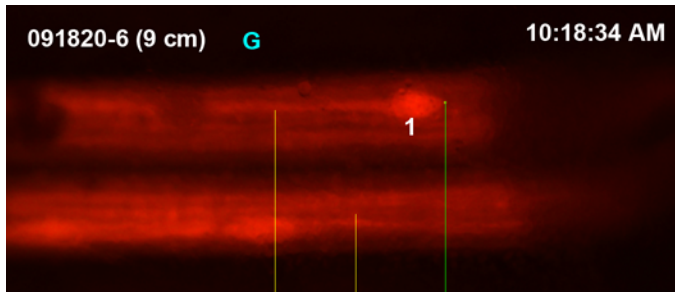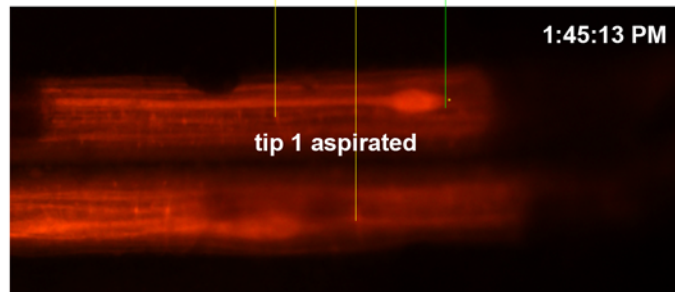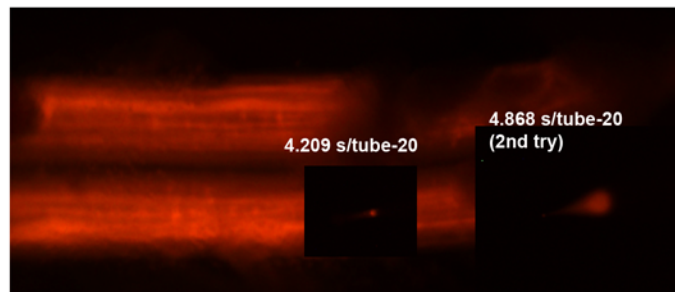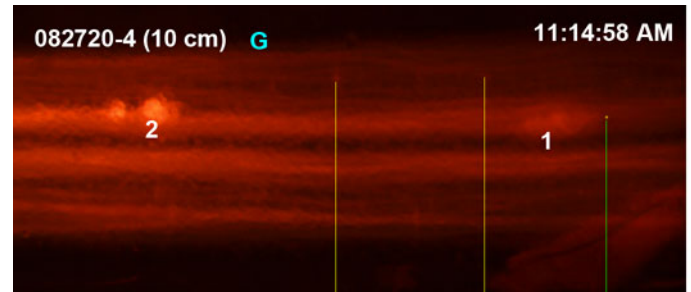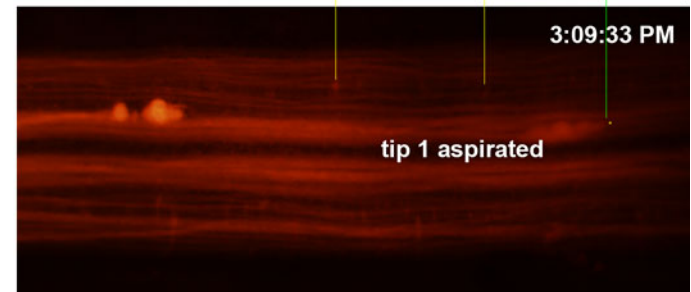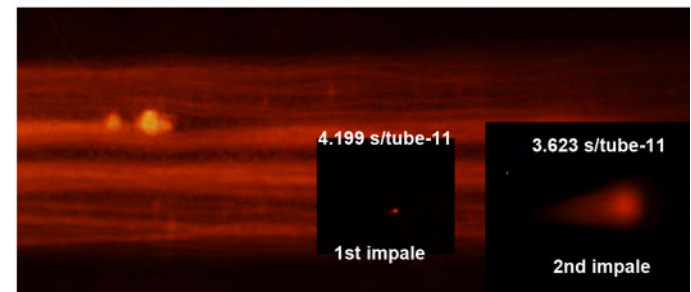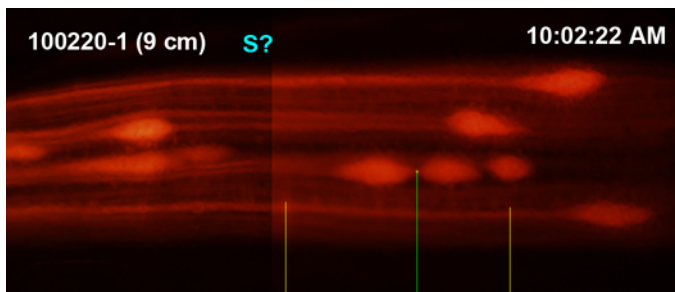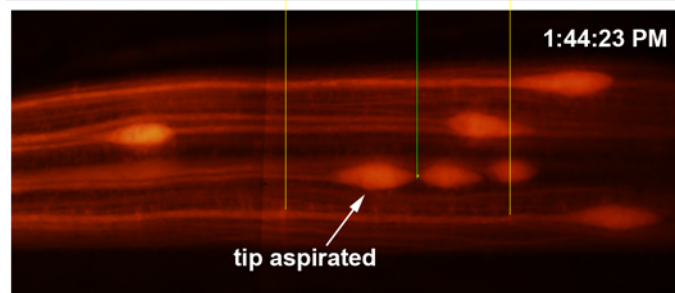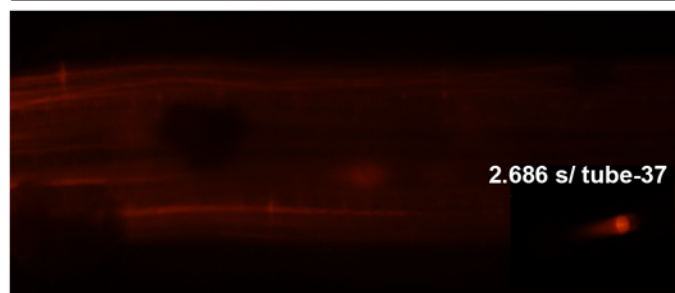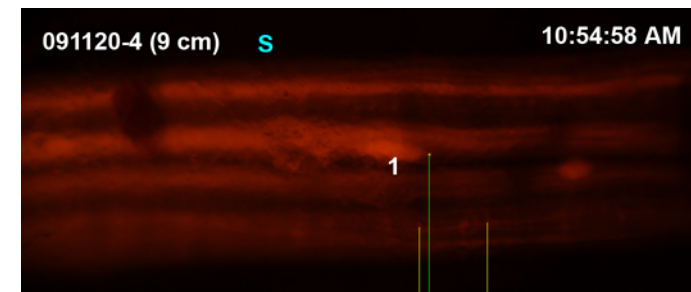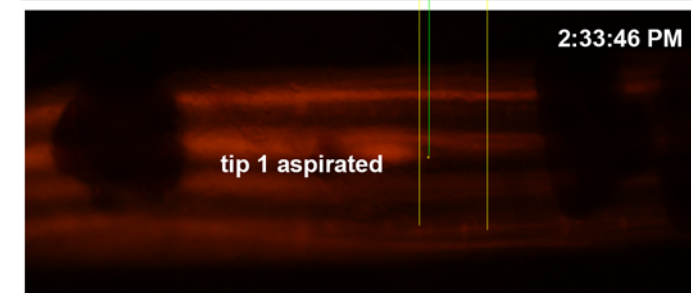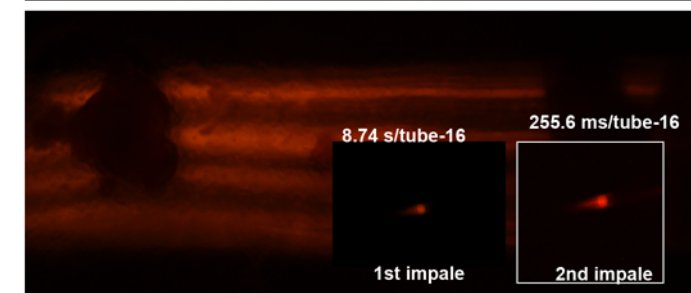



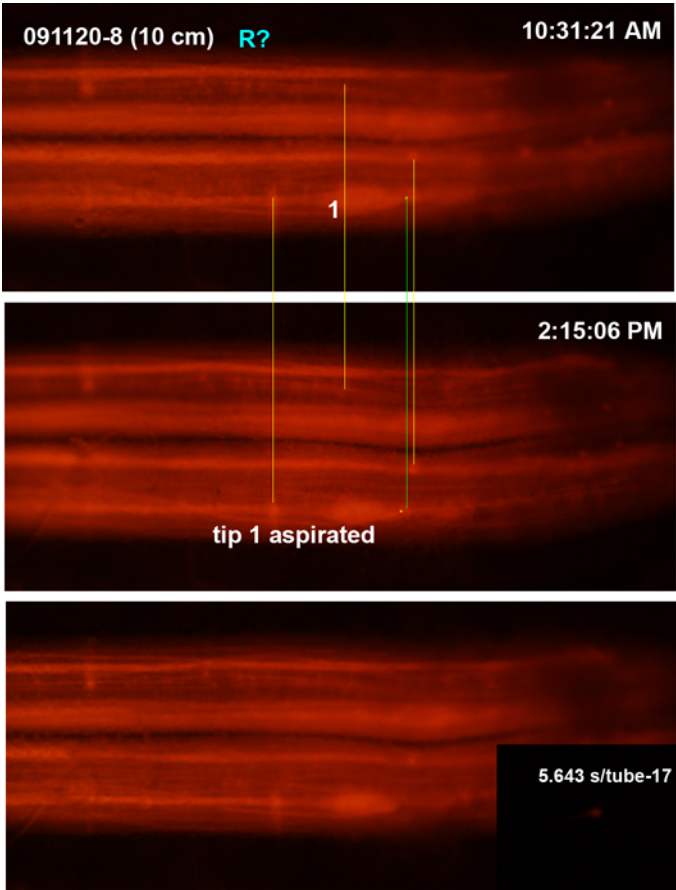

Supplement: s1 [file s1]

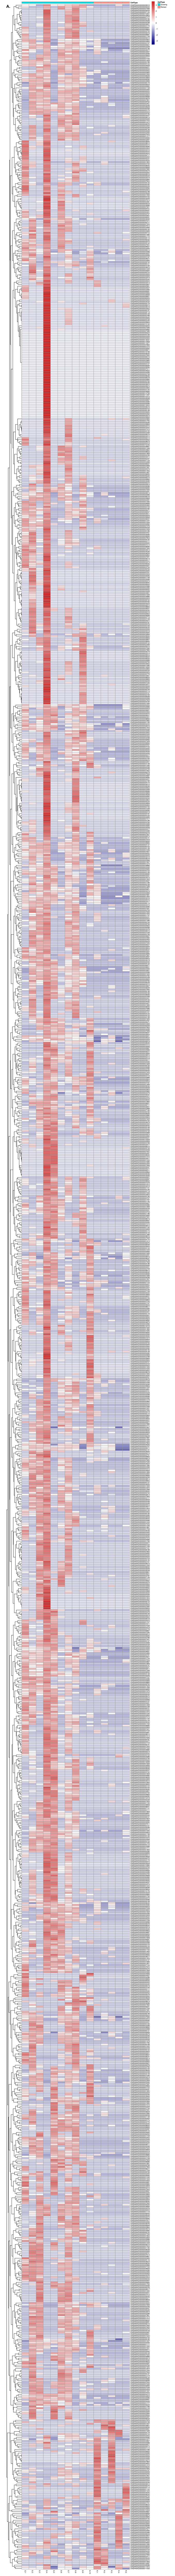



B.

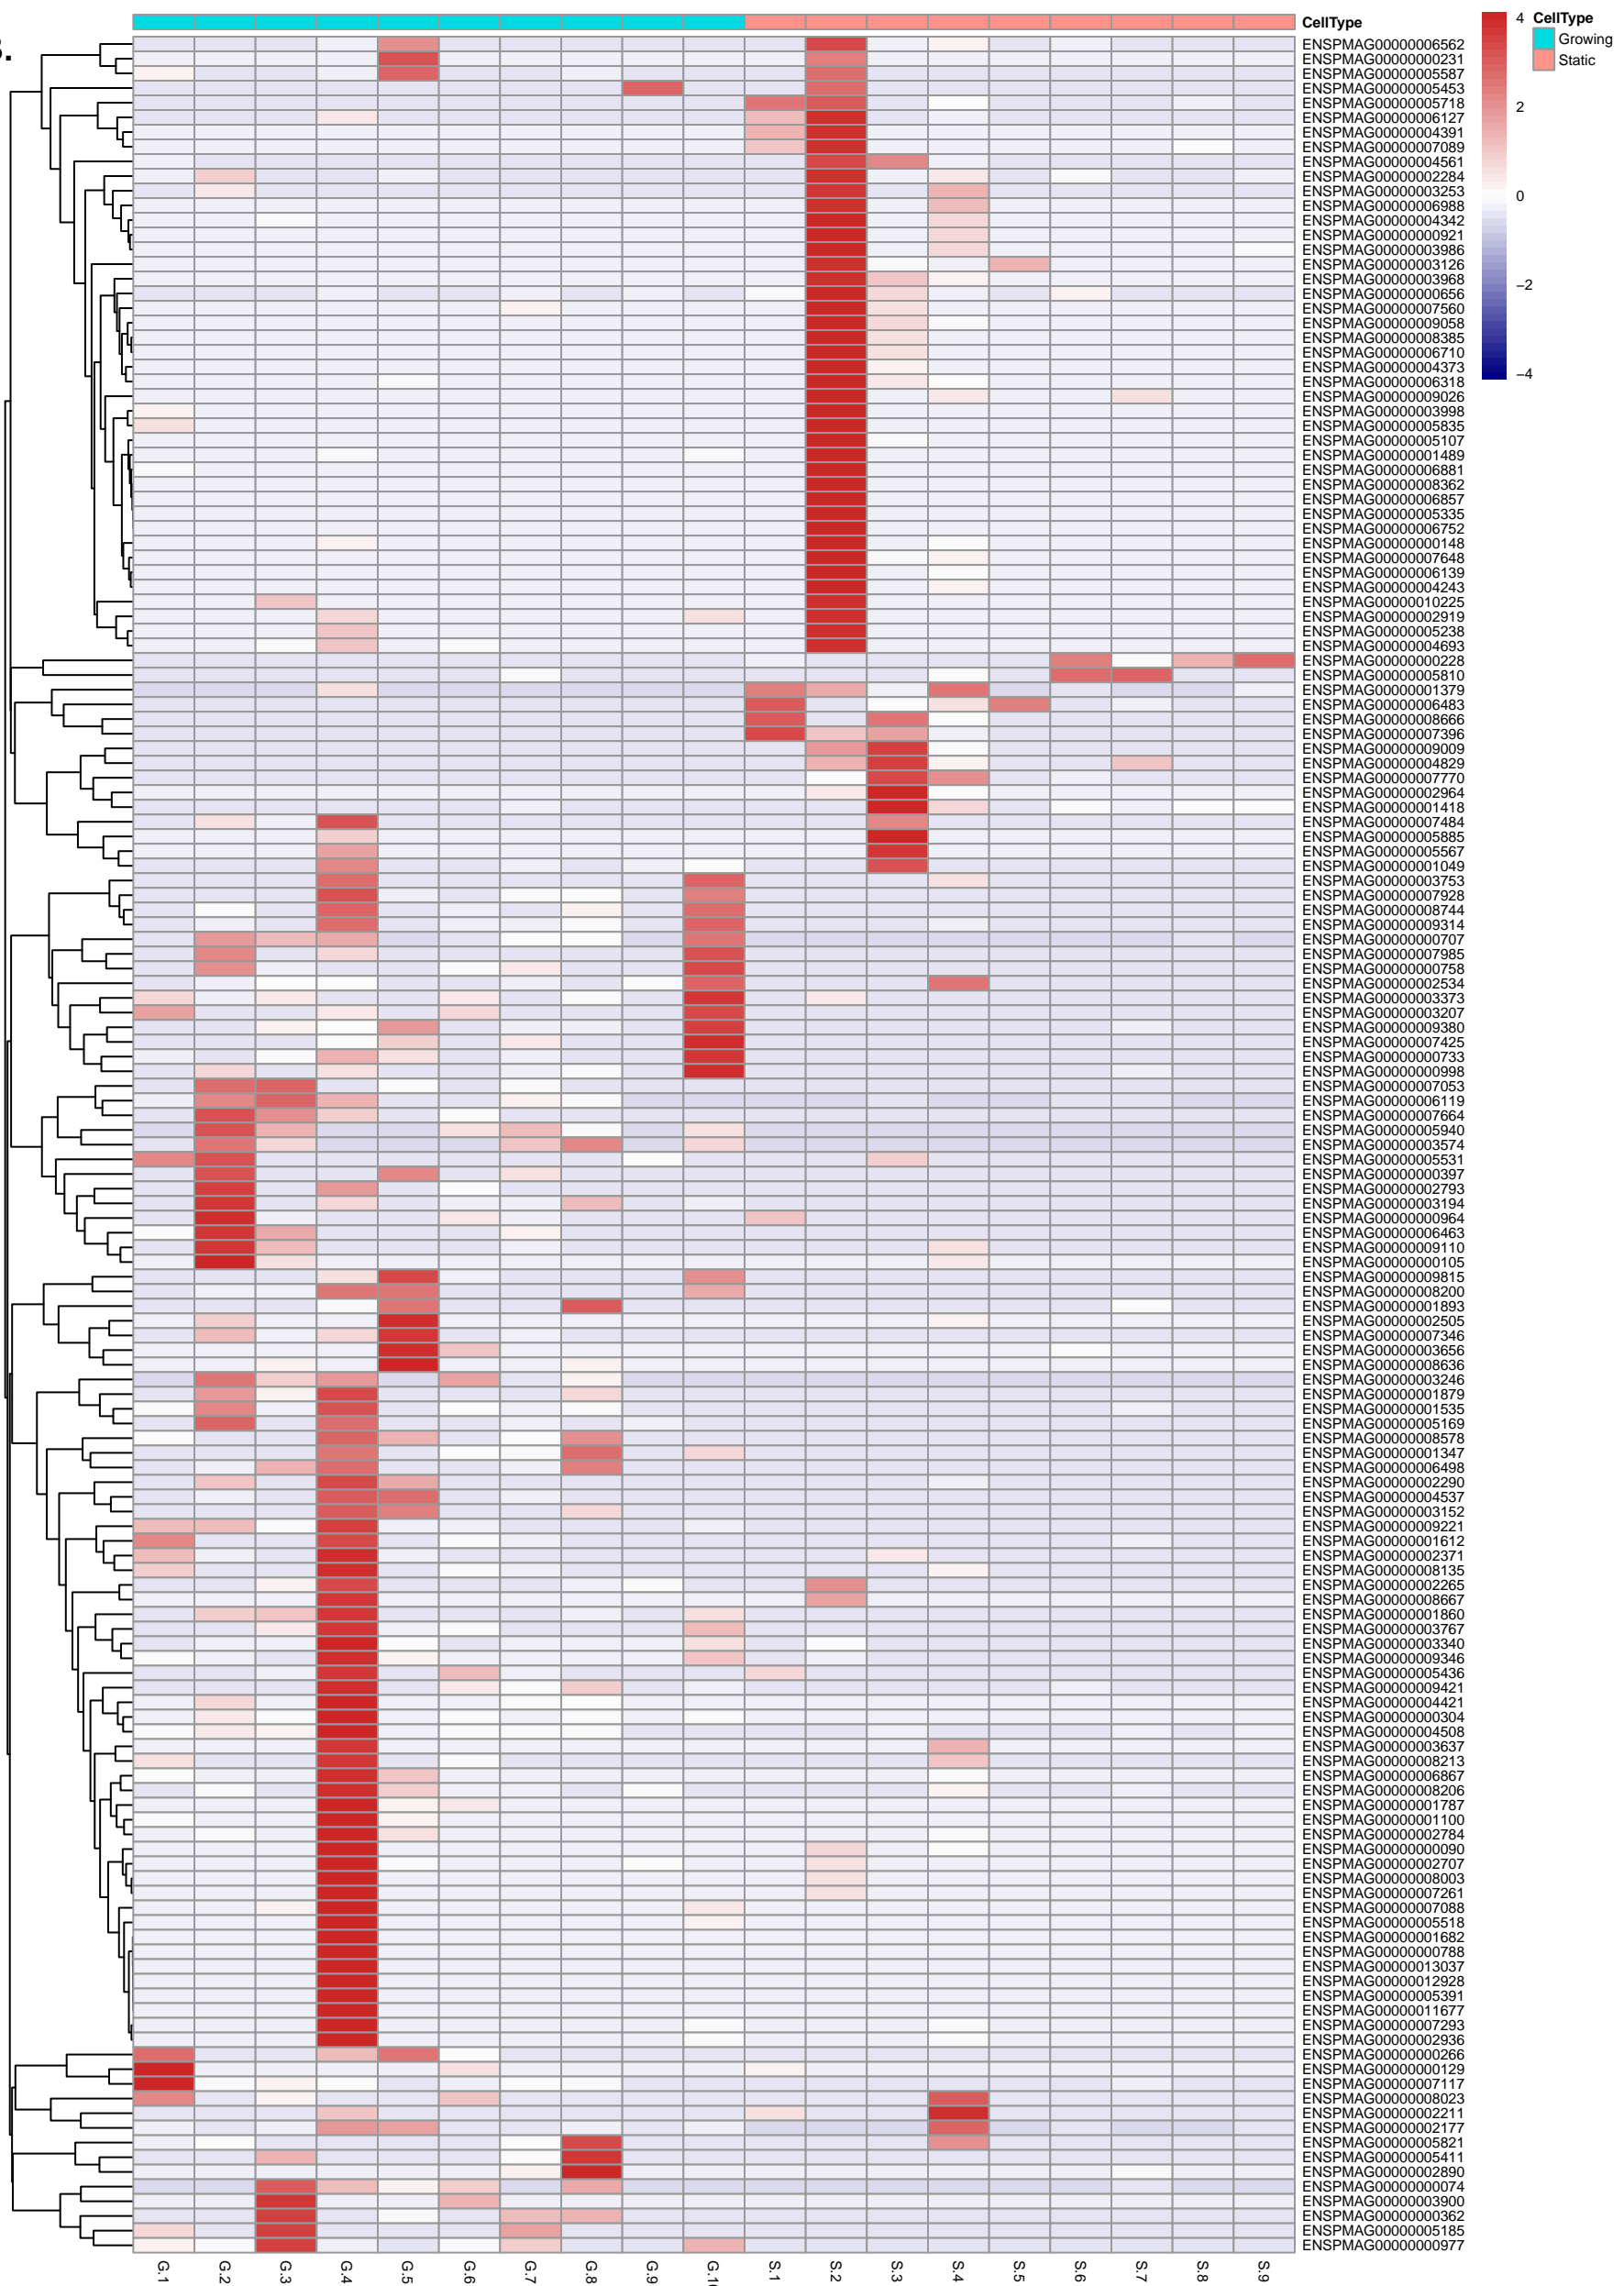



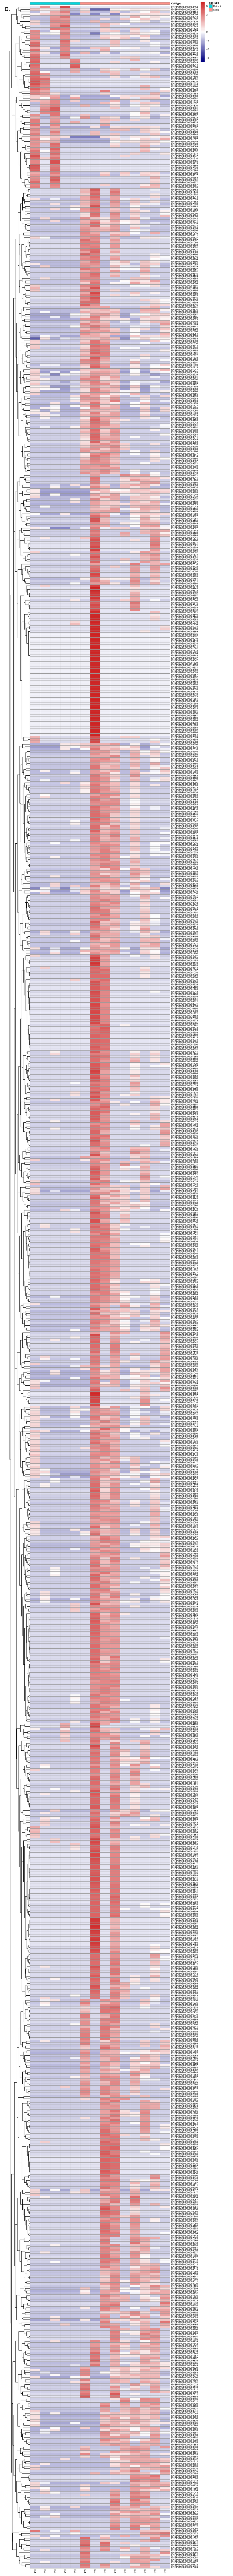

Supplement: s1 [file s1]
